## **Cerebrovascular reactivity impairment in genetic frontotemporal dementia**

Ivana Kancheva\*,<sup>1,2</sup> Arabella Bouzigues,<sup>3</sup> Lucy L. Russell,<sup>3</sup> Phoebe H. Foster,<sup>3</sup> Eve Ferry-Bolder,<sup>3</sup> John van Swieten,<sup>4</sup> Lize Jiskoot,<sup>4</sup> Harro Seelaar,<sup>4</sup> Raquel Sanchez-Valle,<sup>5</sup> Robert Laforce Jr,<sup>6</sup> Caroline Graff,<sup>7,8</sup> Daniela Galimberti,<sup>9,10</sup> Rik Vandenberghe,<sup>11,12,13</sup> Alexandre de Mendonça,<sup>14</sup> Pietro Tiraboschi,<sup>15</sup> Isabel Santana,<sup>16,17</sup> Alexander Gerhard,<sup>18,19,20</sup> Johannes Levin,<sup>21,22,23</sup> Sandro Sorbi,<sup>24,25</sup> Markus Otto,<sup>26</sup> Florence Pasquier,<sup>27,28,29</sup> Simon Ducharme,<sup>30,31</sup> Chris R. Butler,<sup>32,33</sup> Isabelle Le Ber,<sup>34,35,36</sup> Elizabeth Finger,<sup>37</sup> Maria Carmela Tartaglia,<sup>38</sup> Mario Masellis,<sup>39</sup> Matthis Synofzik,<sup>40,41</sup> Fermin Moreno,<sup>42,43</sup> Barbara Borroni,<sup>44</sup> Jonathan D. Rohrer,<sup>3</sup> Louise van der Weerd,<sup>2,45</sup> James B. Rowe†,<sup>1,46</sup> and Kamen A. Tsvetanov†<sup>1,47</sup> on behalf of The GENFI consortium\*.

*1 Department of Clinical Neurosciences and Cambridge University Hospitals NHS Trust, University of Cambridge, Cambridge, UK*

*2 Department of Radiology, Leiden University Medical Centre, Leiden, The Netherlands*

*3 Dementia Research Centre, Department of Neurodegenerative Disease, UCL Queen Square Institute of Neurology, London, UK.*

*4 Department of Neurology, Erasmus Medical Centre, Rotterdam, The Netherlands*

*5 Alzheimer's disease and Other Cognitive Disorders Unit, Neurology Service, Hospital Clínic, Institut d'Investigacions Biomèdiques August Pi I Sunyer, University of Barcelona, Barcelona, Spain*

*6 Clinique Interdisciplinaire de Mémoire, Département des Sciences Neurologiques, CHU de Québec, and Faculté de Médecine, Université Laval, QC, Canada*

*7 Department of Neurobiology, Care Sciences and Society, Centre for Alzheimer Research, Division of Neurogeriatrics, Bioclinicum, Karolinska Institutet, Solna, Sweden*

*8 Unit for Hereditary Dementias, Theme Inflammation and Ageing, Karolinska University Hospital, Solna, Sweden*

Impaired Cerebrovascular Reactivity in Genetic Frontotemporal Dementia

*9 Fondazione Ca' Granda, IRCCS Ospedale Policlinico, Milan, Italy*

*10 University of Milan, Centro Dino Ferrari, Milan, Italy*

*11 Laboratory for Cognitive Neurology, Department of Neurosciences, KU Leuven, Leuven, Belgium*

*12 Neurology Service, University Hospitals Leuven, Leuven, Belgium*

*13 Leuven Brain Institute, KU Leuven, Leuven, Belgium*

*14 Faculty of Medicine, University of Lisbon, Lisbon, Portugal*

*15 Fondazione IRCCS Istituto Neurologico Carlo Besta, Milano, Italy*

*16 University Hospital of Coimbra (HUC), Neurology Service, Faculty of Medicine, University of Coimbra, Coimbra, Portugal*

*17 Centre for Neuroscience and Cell Biology, Faculty of Medicine, University of Coimbra, Coimbra, Portugal*

*18 Division of Psychology Communication and Human Neuroscience, Wolfson Molecular Imaging Centre, University of Manchester, Manchester, UK*

*19 Department of Nuclear Medicine, Centre for Translational Neuro- and Behavioural Sciences, University Medicine Essen, Essen, Germany*

*20 Department of Geriatric Medicine, Klinikum Hochsauerland, Arnsberg, Germany*

*21 Department of Neurology, Ludwig-Maximilians Universität München, Munich, Germany*

*22 German Centre for Neurodegenerative Diseases (DZNE), Munich, Germany*

*23 Munich Cluster of Systems Neurology (SyNergy), Munich, Germany*

*24 Department of Neurofarba, University of Florence, Italy*

*25 IRCCS Fondazione Don Carlo Gnocchi, Florence, Italy*

*26 Department of Neurology, University of Ulm, Germany*

*27 Univ Lille, France*

*28 Inserm 1172, Lille, France*

Impaired Cerebrovascular Reactivity in Genetic Frontotemporal Dementia

29 *CHU, CNR-MAJ, Labex Distalz, LiCEND Lille, France*

30 *Department of Psychiatry, McGill University Health Centre, McGill University, Montreal, Québec, Canada*

31 *McConnell Brain Imaging Centre, Montreal Neurological Institute, McGill University, Montreal, Québec, Canada*

32 *Nuffield Department of Clinical Neurosciences, Medical Sciences Division, University of Oxford, Oxford, UK*

33 *Department of Brain Sciences, Imperial College London, UK*

34 *Sorbonne Université, Paris Brain Institute – Institut du Cerveau – ICM, Inserm U1127, CNRS UMR 7225, AP-HP - Hôpital Pitié-Salpêtrière, Paris, France*

35 *Centre de référence des démences rares ou précoces, IM2A, Département de Neurologie, AP-HP - Hôpital Pitié-Salpêtrière, Paris, France*

36 *Département de Neurologie, AP-HP - Hôpital Pitié-Salpêtrière, Paris, France*

37 *Department of Clinical Neurological Sciences, University of Western Ontario, London, ON, Canada*

38 *Tanz Centre for Research in Neurodegenerative Diseases, University of Toronto, Toronto, ON, Canada*

39 *Sunnybrook Health Sciences Centre, Sunnybrook Research Institute, University of Toronto, Toronto, Canada*

40 *Department of Neurodegenerative Diseases, Hertie-Institute for Clinical Brain Research and Centre of Neurology, University of Tübingen, Tübingen, Germany*

41 *Centre for Neurodegenerative Diseases (DZNE), Tübingen, Germany*

42 *Cognitive Disorders Unit, Department of Neurology, Donostia University Hospital, San Sebastian, Spain*

43 *Neuroscience Area, Biodonostia Health Research Institute, San Sebastian, Gipuzkoa, Spain*

Impaired Cerebrovascular Reactivity in Genetic Frontotemporal Dementia

*44 Neurology Unit, Department of Clinical and Experimental Sciences, University of Brescia, Brescia, Italy*

*45 Department of Human Genetics, Leiden University Medical Centre, Leiden, The Netherlands*

*46 MRC Cognition and Brain Science Unit, University of Cambridge, Cambridge, UK*

*47 Department of Psychology, University of Cambridge, Cambridge, UK*

† *Joint senior authors*

**\*Corresponding author:** Ivana Kancheva, MSc, Leiden University Medical Centre, Department of Radiology, Room C-03-119, Leiden, The Netherlands; Phone number: +31(6) 870 35 106, Email address: [i.k.kancheva@lumc.nl](mailto:i.k.kancheva@lumc.nl); [ik413@cam.ac.uk](mailto:ik413@cam.ac.uk)

Impaired Cerebrovascular Reactivity in Genetic Frontotemporal Dementia

**Abstract**

1

2 INTRODUCTION: Cerebrovascular reactivity (CVR) is an indicator of cerebrovascular  
3 health and its signature in hereditary frontotemporal dementia (FTD) remains unknown. We  
4 investigated CVR in genetic FTD and its relationship to cognition.

5

6 METHODS: CVR differences were assessed between 284 pre-symptomatic and 124  
7 symptomatic mutation carriers, and 265 non-carriers, using resting-state fluctuation  
8 amplitudes (RSFA) on component-based and voxel-level RSFA maps. Associations and  
9 interactions between RSFA, age, genetic status, and cognition were examined using  
10 generalised linear models.

11

12 RESULTS: Compared to non-carriers, mutation carriers exhibited greater RSFA reductions,  
13 predominantly in frontal cortex. These reductions increased with age. The RSFA in these  
14 regions correlated with cognitive function in symptomatic and, to a lesser extent, pre-  
15 symptomatic individuals, independent of disease stage.

16

17 DISCUSSION: CVR impairment in genetic FTD predominantly affects frontal cortical areas,  
18 and its preservation may yield cognitive benefits for at-risk individuals. Cerebrovascular  
19 health may be a potential target for biomarker identification and disease-modifying efforts.

20

21 *Keywords:* genetic frontotemporal dementia, functional magnetic resonance imaging, resting-  
22 state fluctuation amplitudes, cerebrovascular reactivity, cognitive impairment

23

24

25 **1. Background**

26

27 Frontotemporal dementia (FTD) encompasses a clinically heterogeneous group of  
28 neurodegenerative diseases [1]. About a third of FTD cases present an autosomal dominant  
29 family history, commonly caused by mutations in three genes: chromosome 9 open reading  
30 frame 72 (*C9orf72*), progranulin (*GRN*), and microtubule-associated protein tau (*MAPT*) [2].  
31 The study of prodromal FTD has identified neuropathological changes and biomarker  
32 abnormalities decades before disease onset, including brain atrophy, reduced white matter  
33 (WM) integrity, and disrupted functional connectivity, predominantly affecting the fronto-  
34 temporo-parietal regions [3].

35

36 In addition to the tau and TDP-43-associated molecular pathologies, and secondary  
37 inflammation, the pathophysiology of FTD involves cerebrovascular dysregulation [4]. It is  
38 characterised by impairments in the brain's neurovascular unit (NVU) and blood-brain barrier  
39 (BBB), with damaged endothelial cells, dysfunctional pericytes, and adjacent reactive  
40 microglia, in people carrying FTD-related mutations [5, 6]. Furthermore, reductions in  
41 cerebral blood flow (CBF) are found in both sporadic and genetic FTD, especially in frontal  
42 cortex [7, 8]. The changes in cerebral blood flow correlate with impaired performance on  
43 neuropsychological tests [9]. Combined with evidence of small-vessel pathology in autopsy-  
44 confirmed cases with frontotemporal lobar degeneration (FTLD) [10], these findings suggest  
45 a synergistic contribution of neurodegeneration and cerebrovascular impairment to the  
46 pathophysiology of FTD [4].

47

## Impaired Cerebrovascular Reactivity in Genetic Frontotemporal Dementia

48 An important aspect of cerebrovascular function is cerebrovascular reactivity (CVR).  
49 CVR denotes the capacity of cerebral blood vessels to constrict or dilate in response to  
50 physiological modulators, such as carbon dioxide concentration [11]. CVR regulates regional  
51 blood flow via pH-dependent modulation of vascular smooth muscle tone [12-14]. It is  
52 compromised by ageing [15], impaired endothelial function [16], and hypertension [17]. The  
53 blood oxygenation-level dependent (BOLD) contrast reveals CVR alterations in Alzheimer's  
54 disease (AD) and its prodrome [18, 19], leading to the hypothesis of comparable FTD-related  
55 changes in CVR.

56

57 In this study, we investigated CVR in pre-symptomatic and symptomatic genetic FTD.  
58 We used existing resting-state functional magnetic resonance imaging (rs-fMRI) data that are  
59 based on exploiting naturally occurring fluctuations in carbon dioxide, induced by variations  
60 in the cardiac and respiratory cycles, which moderate the BOLD signal [20, 21]. Resting-state  
61 fluctuation amplitudes (RSFA) of the BOLD signal is a safe, scalable, and robust alternative  
62 to the standard MRI approaches [22-24]. It is especially suitable for large-scale applications  
63 with frail subjects, as it does not require hypercapnic gas inhalation, breath-holding, or  
64 vasodilatory drugs [24-25], for a review, see Tsvetanov et al. (2021) [26]. RSFA has already  
65 been used to assess differences in cerebrovascular and cardiovascular function associated  
66 with ageing [27-29], cerebrovascular disorders [30], stroke [31], AD [32], as well as other  
67 acute conditions that might heighten the risk of dementia [33].

68

69 The principal aim was to determine the CVR signature of pre-symptomatic and  
70 symptomatic genetic FTD. A corollary was to assess CVR correlations with age and clinical  
71 status. We predicted reductions in RSFA in at-risk mutation carriers compared to mutation-

72 negative family members; and that these differences would increase with disease progression  
73 and relate to impaired cognitive performance.

74

## 75 **2. Methods**

76

### 77 **2.1. Participants**

78

79 Data were drawn from the fifth data freeze of the Genetic Frontotemporal Dementia  
80 Initiative (GENFI, [www.genfi.org](http://www.genfi.org)), which included 31 research sites across Europe and  
81 Canada. The study was approved by the institutional review boards at each site and written  
82 informed consent was provided by participants. A total of 680 subjects were recruited  
83 between January 30, 2012, and May 28, 2019, from families with a confirmed pathogenic  
84 genetic mutation in *C9orf72*, *GRN*, or *MAPT*. They were either (i) symptomatic mutation  
85 carriers, (ii) first-degree relatives of mutation carriers who were carrying a mutation, but did  
86 not exhibit any symptoms (that is, pre-symptomatic), or (iii) mutation-negative family  
87 members who served as a control group, termed non-carriers. Subjects were classified as  
88 symptomatic if their clinician judged the presence of symptoms consistent with the diagnosis  
89 of a progressive in nature degenerative disorder. Seven datasets were excluded due to motion-  
90 related or other imaging artifacts (three symptomatic subjects with *C9orf72* mutations; three  
91 pre-symptomatic *GRN* carriers, and one mutation-negative individual from a family with a  
92 *GRN* mutation). This resulted in 673 usable fMRI scans from 124 symptomatic mutation  
93 carriers (61 *C9orf72*, 40 *GRN*, 23 *MAPT*), 284 pre-symptomatic mutation carriers (107  
94 *C9orf72*, 123 *GRN*, 54 *MAPT*), and 265 mutation-negative controls.

95

96



## 97           **2.2. Neurocognitive Assessment and Indices of Cognitive Function**

98

99           All participants underwent the standardised GENFI clinical evaluation consisting of  
100 family and medical history, functional status, and physical examination in corroboration with  
101 collateral history from a close contact. Subjects also completed a neuropsychological battery,  
102 which included behavioural measures of cognitive function from the Uniform Data Set [34].  
103 From this test battery, we used scores related to executive function (Digit Span Forwards and  
104 Backwards from the Wechsler Memory Scale-Revised; Parts A and B of the Trail Making  
105 Test; a Digit Symbol Task) and language (the short version of the Boston Naming Test;  
106 Category Fluency (animals and combined)), as well as the Wechsler Abbreviated Scale of  
107 Intelligence Block Design Task. More details on the recruitment procedure and clinical  
108 assessment protocol can be found in Rohrer et al. (2015) [35].

109

110           As a proxy of cognitive function for subsequent statistical analysis, we used Principal  
111 Component Analysis (PCA) to derive a latent variable from a set of cognitive performance  
112 assessments. This enabled us to obtain a composite summary score characterising the  
113 complexity of cognition whilst minimising the statistical problem of multiple comparisons  
114 when investigating associations between genetic status, RSFA, and cognitive function. Thus,  
115 we conducted PCA on subjects' performance measures from the Digit Span Forwards and  
116 Backwards task, Parts A and B of the Trail Making Test, the Digit Symbol Task, Boston  
117 Naming Test, Category Fluency (animals and combined), and Block Design Task to reduce  
118 the dimensionality of cognitive function into one latent variable summarising the largest  
119 portion of shared variance as the first principal component (PC 1). In cases of missing values  
120 for some of the metrics, multivariate Markov Chain Monte Carlo imputation was performed

121 using the default settings of the multivariate imputation by chained equations (MICE) in R  
122 [36].

### 123 **2.3. Image Acquisition and Pre-processing**

124

125 A three-dimensional (3D) structural MRI was obtained for each participant using a  
126 T1-weighted Magnetic Prepared Rapid Gradient-Echo (MPRAGE) sequence on 3T scanners  
127 available from various vendors. The scanning protocols at each GENFI site were optimised to  
128 accommodate different manufacturers and field strengths [35]. The following acquisition  
129 parameters were used: median isotropic resolution of 1 mm; repetition time (TR) of 2000 ms  
130 (6.6 to 2400 ms); echo time (TE) of 2.9 ms (2.8 to 4.6 ms); inversion time (TI) of 8 ms (8 to 9  
131 ms); field of view (FOV) of  $256 \times 256 \times 208$  mm, with a minimum scanning time of at least  
132 283 s (283 to 462 s).

133

134 The T1-weighted images were analysed using FSL pipelines [37, 38] and modules,  
135 which called relevant functions from Statistical Parametric Mapping (SPM12, Wellcome 112  
136 Department of Imaging Neuroscience, London, UK; [www.fil.ion.ucl.ac.uk/spm](http://www.fil.ion.ucl.ac.uk/spm)) [39]. Native-  
137 space segmentation of grey matter (GM), WM, and cerebrospinal fluid (CSF) tissue classes  
138 and warps for normalisation to the Montreal Neurological Institute (MNI) template space  
139 were estimated using FSL.

140

141 For resting-state fMRI measurements, Echo-planar imaging (EPI) data were obtained  
142 with at least six minutes of scanning. Analogous imaging sequences were developed by the  
143 GENFI Imaging Core team and used at each GENFI study site to account for different  
144 scanner models and field strengths. EPI data were acquired over a minimum of 308 s (median  
145 500 s) and had a median TR of 2500 ms (2200 to 2500 ms); TE of 30 ms; flip angle of 80 ms

## Impaired Cerebrovascular Reactivity in Genetic Frontotemporal Dementia

146 (80 to 85 ms); in-plane resolution of  $2.72 \times 2.72$  mm ( $2.72$ - $3.50 \times 2.72$ - $3.25$  mm); slice  
147 thickness of 3.5 mm ( $2.72$  to  $3.5$  mm). Participants were instructed to lie still with their eyes  
148 closed. The initial six volumes were discarded to enable T1 equilibration. To quantify the  
149 total motion for each participant, the root mean square volume-to-volume displacement was  
150 computed using the approach of Jenkinson et al. (2002) [40].

151

152 The pre-processing was carried out using SPM12 running under MATLAB R2021b  
153 (MathWorks, <https://uk.mathworks.com/>). The pre-processing steps comprised (i) spatial  
154 realignment to correct for head motion and movement by distortion interactions, (ii) slice-  
155 time correction to the middle slice, (iii) co-registration of the EPI to the participants' T1  
156 anatomical scans. The normalisation parameters from the T1 image processing were then  
157 applied to warp the functional images to MNI space. After that, the spatially normalised  
158 images were smoothed with a Gaussian kernel of Full Width at Half Maximum (FWHM) of 8  
159 mm to meet the lattice assumption of random field theory and account for residual inter-  
160 participant structural variability.

161

162 Further processing procedures of the resting-state time-series for estimation of RSFA  
163 involved the application of data-driven Independent Component Analysis (ICA) of single-  
164 subject time-series denoising, with noise components selected and removed automatically  
165 using *a priori* heuristics from the ICA-based Automatic Removal of Motion Artifacts  
166 (AROMA) toolbox [41]. A general linear model (GLM) of the time-course at each voxel was  
167 computed to further diminish any residual effects of noise confounds [42]. This included  
168 linear and quadratic detrending of the fMRI signal, covarying out the motion parameters,  
169 WM, and CSF signals, as well as their squares and first derivative [43], and a band-pass filter  
170 (0.0078–0.01 Hz). Signals from WM and CSF were estimated for each volume from the

171 mean value of WM and CSF masks derived by thresholding SPM's corresponding tissue  
172 probability maps at 0.75. The normalised variance (i.e., the temporal standard deviation (SD)  
173 of the EPI signal amplitudes over the mean signal intensity) of these filtered time-series was  
174 calculated on a voxel-wise basis to define RSFA.

175

## 176 **2.4. Indices of Cerebrovascular Function using RSFA**

### 177 ***2.4.1. Component-based Analysis***

178 To implement ICA, the pre-processed RSFA maps were decomposed into a set of  
179 spatially independent sources using the Source-Based Morphometry toolbox [44] in the  
180 Group ICA for fMRI Toolbox (GIFT; <http://mialab.mrn.org/software/gift>). Briefly, the  
181 fastICA algorithm was applied after the optimal number of sources explaining the variance in  
182 the data was identified by PCA with Minimum Description Length (MDL) criterion [45-47].  
183 By combining PCA and ICA, one can decompose an n-by-m matrix of subjects-by-voxels  
184 into a source matrix that maps independent components (ICs) to voxels (here referred to as  
185 'IC maps'), and a mixing matrix that maps ICs to participants. The mixing matrix indicates  
186 the degree to which an individual expresses a defined IC, known as the subject scores in the  
187 mixing matrix. These scores were scaled to standardised values (z-scores) prior to between-  
188 group analyses. The algorithmic and statistical reliability of the extracted components was  
189 confirmed with 128 ICASSO (tool for investigating the reliability of ICA estimates by  
190 clustering and visualisation) iterations [48]. Components showing high reliability across  
191 multiple ICASSO iterations and comprising GM areas were deemed relevant and used in  
192 subsequent analyses. This decision was based on the understanding that RSFA alterations  
193 within GM areas are indicative of cerebrovascular reactivity (CVR) [29] and are shown to be  
194 sensitive to cognitive function [49].

195

196

#### 197 ***2.4.2. Voxel-based Univariate Analysis***

198 To understand the spatial distribution of CVR effects further, we performed a  
199 sensitivity voxel-wise analysis on the RSFA maps using SPM12 in MATLAB. Clusters  
200 where between-group RSFA differences were observed after correction for multiple testing  
201 were used to define regions of interest (ROIs) for visualisation of effects across subjects.

### 202 **2.5. Statistical Analysis**

#### 203 ***2.5.1. Descriptive Statistics***

204 Demographic characteristics were compared with SPSS (IBM Corp. Released 2021.  
205 IBM SPSS Statistics for Windows, Version 29.0. Armonk, NY: IBM Corp). Due to unequal  
206 sample sizes and variances between groups, Welch's ANOVA with Games-Howell post hoc  
207 tests were employed for continuous data. Chi-square tests were used for categorical variables.  
208 The significance level was defined as two-tailed, and the threshold was set at  $p = 0.05$  for all  
209 statistical procedures. In keeping with other GENFI reports, years to expected onset (EYO)  
210 was defined as the difference between age at assessment and mean age at onset within the  
211 family [35]. EYO is only provided for completeness and should be interpreted with caution,  
212 noting that age of symptom onset cannot be reliably predicted based on family history in  
213 *GRN* and *C9orf72* mutation carriers [50].

#### 214 ***2.5.2. FTD-related Effects on Cerebrovascular Indices using RSFA***

215 Figure 1 gives a schematic overview of the processing pipeline and analytic approach  
216 used in the study. RSFA differences between symptomatic and pre-symptomatic mutation

## Impaired Cerebrovascular Reactivity in Genetic Frontotemporal Dementia

217 carriers (all genetic mutations combined) and non-carriers were examined on component-  
218 based estimates of RSFA using multiple linear regression (MLR) with a robust fitting  
219 algorithm (MATLAB function *fitlm.m*). In these models, the IC subject scores for each  
220 component (termed  $RSFA_{ICn}$ , where  $n$  denotes the corresponding number of the selected  
221 component) were entered as a dependent variable, with age, sex, and handedness as  
222 covariates of no interest. Although scanning protocols within the cohort were designed to  
223 maximise comparability across GENFI scanners and sites [35], distinct scanning platforms  
224 can introduce systematic differences, potentially confounding true effects of interest [51].  
225 Thus, scanning site was also inserted as a covariate of no interest.

226 We also tested the moderating effect of age on the case-control differences to explore  
227 disease progression-related effects across genetic status groups, i.e., whether the age effect in  
228 pre-symptomatic carriers would be stronger than the ‘normal’ age effect in non-carriers, due  
229 to the development of latent, pre-symptomatic pathology. This enabled us to assess the  
230 variance explained by genetic status beyond that accounted for by age and other covariates in  
231 the MLR.

232 All models’ formulas were specified by Wilkinson’s notation, e.g., ‘ $RSFA_{IC} \sim I +$   
233  $Genetic\ status * Age + Sex + Handedness + Scanning\ Site$ ’, providing a flexible way to test  
234 for main effects of predictors of interest (i.e., genetic status and age) and their interaction  
235 (genetic status\*age), whilst adjusting the models for confounders of no interest (sex,  
236 handedness, scanning site). To account for issues related to multiple testing, the overall  
237 model fit was corrected using the Benjami-Hochberg procedure to control the false discovery  
238 rate (FDR) at the 0.05 level. To better understand the nature of the observed effects in the  
239 models surviving multiple comparisons, post hoc tests were performed across sub-groups of

240 interest (e.g., comparing non-carriers to symptomatic carriers, non-carriers to pre-  
241 symptomatic carriers, and pre-symptomatic carriers to symptomatic carriers).

242 A sensitivity analysis was also conducted on the voxel-wise RSFA maps to further  
243 explore the spatial distribution of CVR effects within the same statistical model ( $RSFA_{Voxel} \sim$   
244  $1 + Genetic\ status * Age + Sex + Handedness + Scanning\ Site$ ). This included the following  
245 comparisons: (i) non-carriers versus symptomatic carriers, (ii) non-carriers versus pre-  
246 symptomatic carriers, and (iii) pre-symptomatic carriers versus symptomatic carriers. The  
247 primary cluster-forming threshold was set at  $p = 0.05$ . To correct for the multiple  
248 comparisons problem inherent in mass univariate statistical analysis, we controlled for the  
249 voxel-level FDR at  $p < 0.05$ . For transparency, in cases where results did not reach statistical  
250 significance at FDR-level, the patterns are reported at an uncorrected level of  $p < 0.01$  with a  
251 minimum cluster size of 10 voxels. To visualise the nature of the observed effects and any  
252 further between-group RSFA differences, ROIs were defined by selecting the voxels in an 8-  
253 mm sphere at the peak of significant clusters from the MLR analysis. The average value  
254 across voxels in each ROI was used to illustrate the relationship between RSFA and age for  
255 different genetic status groups. The voxel-based level regions were labelled according to their  
256 overlap with the Johns Hopkins University (JHU) atlas [52].

### 257 ***2.5.3. Behavioural Relevance of Cerebrovascular Impairment***

258 A secondary objective of this study was to evaluate the behavioural relevance of the  
259 RSFA changes observed in the previous analyses for subjects' cognitive function. To assess  
260 differences in cognitive performance scores between genetic status groups, we first carried  
261 out a Kruskal-Wallis test, followed by Mann-Whitney post hoc tests. We subsequently ran a  
262 further series of regression models where cognitive function, as represented by subjects'  
263 scores for PC 1 from the PCA analysis, was the dependent variable. Independent variables

## Impaired Cerebrovascular Reactivity in Genetic Frontotemporal Dementia

264 included the  $RSFA_{IC}$  for each neurocognitively meaningful component (see Methods, 2.4.  
265 Indices of Cerebrovascular Function using RSFA, sub-section 2.4.1. Component-based  
266 Analysis), and its interaction with genetic status, to test whether the relationship between  
267 cognitive performance and RSFA levels would vary across genetic status groups. Covariates  
268 of no interest were age, sex, handedness, and scanning site.

269 Models' formulas, as specified by Wilkinson's notation, took the form: ' $Cognition_{PCI}$   
270  $\sim I + Genetic\ status * RSFA_{IC/Voxel} + Age + Sex + Handedness + Scanning\ Site$ '. FDR  
271 correction was applied ( $FDR < 0.05$ ) and post hoc tests across sub-groups of interest were  
272 conducted in cases where main effects were found (Figure 1).

### 273 **3. Results**

#### 274 **3.1. Demographics**

275 Demographic characteristics of the sample and descriptive statistics are provided in  
276 Table 1. Mutation-negative family members and pre-symptomatic mutation carriers were  
277 younger than symptomatic carriers (mean difference between non-carriers and symptomatic  
278 carriers was 16.68 years ( $p < 0.001$ ) and 18.71 years between pre-symptomatic carriers and  
279 symptomatic carriers, respectively, ( $p < 0.001$ )). The pre-symptomatic carriers were age-  
280 matched to non-carriers ( $p = 0.132$ ). There was a higher proportion of females, relative to  
281 males, in asymptomatic individuals (non-carriers and pre-symptomatic carriers) compared to  
282 symptomatic carriers, and these two groups had also spent more years in education. No  
283 significant differences were observed between the non-carriers and pre-symptomatic carriers  
284 for any of the remaining demographic variables.



Impaired Cerebrovascular Reactivity in Genetic Frontotemporal Dementia

**Table 1.** Demographic information of participants included in the analysis, grouped by genetic status as non-carriers, pre-symptomatic carriers, and symptomatic carriers

| Demographics               | Sample       | NC           | PSC          | SC          | Group comparison,<br><i>P</i> value* |                 |                 |           |
|----------------------------|--------------|--------------|--------------|-------------|--------------------------------------|-----------------|-----------------|-----------|
|                            |              |              |              |             | Sample                               | NC vs SC        | PSC vs SC       | NC vs PSC |
| Total N                    | 673          | 265 (39.38)  | 284 (42.2)   | 124 (18.42) |                                      |                 |                 |           |
| Family mutation            |              |              |              |             |                                      |                 |                 | .126      |
| <i>C9orf72</i>             | 264 (39.23)  |              | 107          | 61          |                                      |                 |                 |           |
| <i>GRN</i>                 | 276 (41.01)  |              | 123          | 40          |                                      |                 |                 |           |
| <i>MAPT</i>                | 133 (19.76)  |              | 54           | 23          |                                      |                 |                 |           |
| Age (years)                | 48.17±13.43  | 45.95±13.09  | 43.93±11.4   | 62.64±7.43  | <b>&lt;.001</b>                      | <b>&lt;.001</b> | <b>&lt;.001</b> | .132      |
| Sex ratio f:m              | 371:302      | 153:112      | 165:119      | 53:71       | <b>.009</b>                          | <b>.006</b>     | <b>.004</b>     | .931      |
| Estimated years from onset | -10.62±13.40 | -13.21±13.47 | -14.30±11.63 | 3.32±6.24   | <b>&lt;.001</b>                      | <b>&lt;.001</b> | <b>&lt;.001</b> | .569      |
| Education (years)          | 14.18±3.45   | 14.51±3.35   | 14.50±3.36   | 12.72±3.53  | <b>&lt;.001</b>                      | <b>&lt;.001</b> | <b>&lt;.001</b> | .998      |

285 Values indicate count (percentage) or mean ± standard deviation.

286 \**P* values are the result of F test or  $\chi^2$  test as appropriate. Bold numbers denote statistical significance at  $p < 0.05$   
 287 level.

288 Abbreviations: *C9orf72*, chromosome 9 open reading frame 72; *GRN*, progranulin; *MAPT*, microtubule-  
 289 associated protein tau. NC, non-carrier; PSC, pre-symptomatic mutation carrier; SC, symptomatic mutation  
 290 carrier. f, female; m, male.

291

292

293

294

295 **3.2. Regional Differences in RSFA based on Independent Component Analysis**

296 Applying ICA to the RSFA data yielded 24 components based on the MDL criterion.  
297 The spatial patterns indicated signal origins within GM regions, as well as origins associated  
298 with vascular aetiology, CSF, or other non-physiological factors (Appendix A, Figure A.1). A  
299 total of 20 components were excluded from further analysis; these included non-GM  
300 components proximal to vascular and CSF territories or components exhibiting characteristics  
301 of physiological noise signals (Appendix A, Table A.1). Additionally, GM components that  
302 did not survive correction for multiple comparisons were also classified as irrelevant. The  
303 overall model fit of four GM components remained significant after FDR correction (Figure  
304 2). These components included strong contributions of voxels within the posterior cingulate  
305 cortex (PCC)/precuneus (IC 4), posterior association and parieto-occipital association areas,  
306 more pronounced on the right side (IC 17), right and left lateral prefrontal cortex (IC 21 and  
307 IC 23, respectively). A tendency of FTD-dependent decrease in RSFA was found in  
308 symptomatic and pre-symptomatic carriers, compared to non-carriers, for all components, but  
309 only reached statistical significance for component IC 21. Post hoc tests revealed that this  
310 effect was driven by differences between the non-carriers and symptomatic mutation carriers,  
311 as well as between the pre-symptomatic and symptomatic carriers. In addition, in analyses  
312 across the entire sample, a significant main effect of genetic status x age interaction was  
313 shown for components IC 17, IC 21, and IC 23, whereby symptomatic carriers showed the  
314 most pronounced age-related RSFA reductions, followed by the presymptomatic carriers, and  
315 then mutation-negative individuals. This suggests a greater age-related RSFA decline in at-  
316 risk or affected mutation carriers relative to non-carriers, which likely further exacerbates  
317 downstream effects of the disease over time, as indicated by the steeper negative slopes of the  
318 regression lines observed in these groups. Spatial maps of these components, accompanied by  
319 scatter plots showing IC subject score values in relation to age and genetic status group, are

Impaired Cerebrovascular Reactivity in Genetic Frontotemporal Dementia

320 presented in Figure 2. Table 2 summarises the numerical output of the MLR models  
321 conducted on the RSFA-IC subject scores for these GM components across the entire sample.  
322 The output of post hoc tests across sub-groups of interest for this analysis is provided in  
323 Appendix A, Table A.2.

324 ICA also revealed components with spatial distribution originating from large blood  
325 vessels and CSF (Appendix A, Figure A.1). For example, components 2 and 3 reflected  
326 signals from the fluid-filled ventricles and cerebral aqueduct. Component 11 indicated signals  
327 originating close to sites of venous drainage, including superior and inferior sagittal sinus,  
328 and transverse sinuses. Other vascular components comprised territories of major blood  
329 vessels, including the Circle of Willis, internal carotid artery, anterior cerebral artery, and  
330 middle cerebral artery. These vascular and CSF components tended to display higher subject  
331 scores in older (symptomatic) individuals, reflecting differences in vascular health and other  
332 physiological factors [26, 28, 29].

333

334

335

336

337

338

339

340

341

342

343

344

## Impaired Cerebrovascular Reactivity in Genetic Frontotemporal Dementia

345

Impaired Cerebrovascular Reactivity in Genetic Frontotemporal Dementia

**Table 2.** Multiple regression analysis results of independent component (IC) subject loadings from independent component analysis (model ' $RSFA_{IC} \sim 1 + Genetic\ status * Age + Sex + Handedness + Scanning\ Site$ ')

| Predictor of interest                               | Model<br>Adjusted R <sup>2</sup> | $\beta$      | T            | Uncorrected<br>P | FDR-<br>corrected P* |
|-----------------------------------------------------|----------------------------------|--------------|--------------|------------------|----------------------|
| <b>IC 4 – Posterior cingulate cortex/precuneus</b>  |                                  |              |              |                  |                      |
|                                                     | 0.62                             |              |              |                  |                      |
| Age                                                 |                                  | <b>-0.09</b> | <b>-3.59</b> | <b>&lt;.001</b>  | <b>.001</b>          |
| Genetic status                                      |                                  | -0.05        | -1.77        | .078             | .124                 |
| Genetic status*Age                                  |                                  | -0.05        | -2.00        | .046             | .085                 |
| <b>IC 17 – Posterior parietal association areas</b> |                                  |              |              |                  |                      |
|                                                     | 0.54                             |              |              |                  |                      |
| Age                                                 |                                  | <b>-0.13</b> | <b>-4.27</b> | <b>&lt;.001</b>  | <b>&lt;.001</b>      |
| Genetic status                                      |                                  | -0.06        | -1.80        | .072             | .098                 |
| Genetic status*Age                                  |                                  | <b>-0.06</b> | <b>-2.17</b> | <b>.030</b>      | <b>.048</b>          |
| <b>IC 21 – Right lateral prefrontal cortex</b>      |                                  |              |              |                  |                      |
|                                                     | 0.44                             |              |              |                  |                      |
| Age                                                 |                                  | <b>-0.11</b> | <b>-3.33</b> | <b>&lt;.001</b>  | <b>.004</b>          |
| Genetic status                                      |                                  | <b>-0.10</b> | <b>-2.68</b> | <b>.008</b>      | <b>.021</b>          |
| Genetic status*Age                                  |                                  | <b>-0.07</b> | <b>-2.31</b> | <b>.021</b>      | <b>.046</b>          |
| <b>IC 23 – Left lateral prefrontal cortex</b>       |                                  |              |              |                  |                      |
|                                                     | 0.49                             |              |              |                  |                      |
| Age                                                 |                                  | <b>-0.22</b> | <b>-7.22</b> | <b>&lt;.001</b>  | <b>&lt;.001</b>      |
| Genetic status                                      |                                  | -0.06        | -1.87        | .062             | .168                 |
| Genetic status*Age                                  |                                  | <b>-0.08</b> | <b>-2.52</b> | <b>.012</b>      | <b>.044</b>          |

RSFA differences across groups of interest following robust multiple linear regression analysis on component-based RSFA maps.

---

Estimated regression parameters,  $t$  values, and  $p$  values are shown for main effects across the entire sample. Outcomes of interest are the RSFA-IC loadings associated with ICA components within GM regions where case-control differences are found. Models are adjusted for sex, handedness, and scanning site.

\* $P$  values are FDR-corrected at the 0.05 level in comparisons across the whole sample (all genetic status groups combined). Bold numbers indicate that  $p$  values are statistically significant.

346

347

### 348 **3.3. Spatial Distribution and Voxel-wise Univariate Differences in RSFA**

349 Overall, voxel-based analysis results were consistent with component-based analysis,  
350 particularly in frontal cortical regions (**Error! Reference source not found.** 3). Group-level  
351 analysis across all genetic groups revealed a consistent pattern of RSFA decreases in frontal  
352 midline areas, cuneus, precuneus, and cerebellum. Moreover, a comparable tendency  
353 emerged in relation to disease progression informed by the interaction between genetic status  
354 and age. Specifically, the inverse relationship between RSFA and age was stronger across the  
355 spectrum from non-carriers to pre-symptomatic carriers to symptomatic carriers. The spatial  
356 distribution of voxel-based RSFA effects, including four representative ROIs where the  
357 strongest effects were demonstrated, is illustrated in Figure 3. The output from the MLR  
358 models performed on the RSFA-ROI estimates across the entire sample is provided in Table  
359 3. The results of post hoc tests across sub-groups of interest conducted subsequently are  
360 provided in Appendix A, Table A.3.

361

362

363

364

365

Impaired Cerebrovascular Reactivity in Genetic Frontotemporal Dementia

**Table 3.** Multiple regression analysis results following voxel-based region of interest analysis (model ' $RSFA_{Voxel} \sim I + Genetic\ Status * Age + Sex + Handedness + Scanning\ Site$ ')

| Predictor of interest               | Model<br>Adjusted R <sup>2</sup> | $\beta$      | T            | Uncorrected<br>P | FDR-<br>corrected P* |
|-------------------------------------|----------------------------------|--------------|--------------|------------------|----------------------|
| <b>Left middle frontal gyrus</b>    | 0.23                             |              |              |                  |                      |
| Age                                 |                                  | <b>-0.09</b> | <b>-2.51</b> | <b>.012</b>      | <b>.034</b>          |
| Genetic status                      |                                  | <b>-0.14</b> | <b>-3.25</b> | <b>.001</b>      | <b>.005</b>          |
| Genetic status*Age                  |                                  | <b>-0.16</b> | <b>-4.28</b> | <b>&lt;.001</b>  | <b>&lt;.001</b>      |
| <b>Right middle frontal gyrus</b>   | 0.25                             |              |              |                  |                      |
| Age                                 |                                  | <b>-0.13</b> | <b>-3.72</b> | <b>&lt;.001</b>  | <b>.002</b>          |
| Genetic status                      |                                  | <b>-0.15</b> | <b>-3.72</b> | <b>&lt;.001</b>  | <b>.002</b>          |
| Genetic status*Age                  |                                  | <b>-0.08</b> | <b>-2.25</b> | <b>.025</b>      | <b>.041</b>          |
| <b>Left superior frontal gyrus</b>  | 0.17                             |              |              |                  |                      |
| Age                                 |                                  | -0.05        | -1.37        | .170             | .320                 |
| Genetic status                      |                                  | <b>-0.19</b> | <b>-4.45</b> | <b>&lt;.001</b>  | <b>&lt;.001</b>      |
| Genetic status*Age                  |                                  | -0.08        | -2.16        | .031             | .093                 |
| <b>Right superior frontal gyrus</b> | 0.26                             |              |              |                  |                      |
| Age                                 |                                  | <b>-0.10</b> | <b>-2.79</b> | <b>.005</b>      | <b>.013</b>          |
| Genetic status                      |                                  | -0.17        | -4.09        | <b>&lt;.001</b>  | <b>&lt;.001</b>      |
| Genetic status*Age                  |                                  | 0.06         | -1.54        | .123             | .148                 |

RSFA differences across groups of interest following robust multiple linear regression analysis in several representative ROIs based on voxel-wise univariate analysis on RSFA maps. Estimated regression parameters, t values, and p values are shown for main effects across the entire sample. Outcomes of interest are the RSFA-ROI values associated with each ROI where case-control differences are found. Models are adjusted for sex, handedness, and scanning site.

\*P values are FDR-corrected at the 0.05 level across the whole sample (all genetic status groups combined). Bold numbers indicate

---

that  $p$  values are statistically significant.

366

367           Regarding genetic status effects on voxel-wise RSFA, there were several clusters  
368 where symptomatic carriers exhibited significant reductions, compared to non-carriers,  
369 including bilateral middle frontal gyrus (MFG), right superior frontal gyrus (SFG), right  
370 superior temporal gyrus (STG), and bilateral PCC. Symptomatic carriers also displayed  
371 greater age-related RSFA decline in the same areas, as well as in the left SFG, left dorsal  
372 anterior cingulate cortex (ACC), and right insula. Similar clusters displayed RSFA decreases  
373 when symptomatic carriers were compared to pre-symptomatic counterparts. In contrast, the  
374 differences between pre-symptomatic carriers and non-carriers did not reach statistical  
375 significance at FDR-levels. However, pre-symptomatic carriers showed a tendency for  
376 reduced RSFA in posterior parietal cortex and more pronounced age-related decline in RSFA  
377 over the parietal and frontal cortex compared to non-carriers, similar to the trend observed in  
378 the symptomatic group. A detailed description of the anatomical localisation of the voxel-  
379 based analysis derived clusters where RSFA differences were noted can be consulted in  
380 Appendix A, Table A.4.

381           Finally, to evaluate differences in RSFA values across different gene mutations, we  
382 compared RSFA-IC loadings and RSFA-ROI estimates in mutation carriers stratified by gene  
383 mutation using MLR. No between-group differences were detected based on mutated gene in  
384 any of the ICs or ROIs where differences between asymptomatic and symptomatic carriers  
385 were encountered in the previous analyses (data are shown in Appendix A, Table A.5).

386

387

388



389 **3.4. Relationship between RSFA and Cognition**

390 PCA analysis estimated PC 1 to explain approximately 62 % of the variance across  
391 the nine measures of cognitive performance, PC 2 – 9 %, and PC 3 – 7 %. We therefore focus  
392 on the relationship between genetic status, RSFA, and PC 1 as a proxy for cognitive function.  
393 The cognitive variables that loaded most prominently on this component included the Trail  
394 Making Test Parts A and B, Digit Symbol Task, and Verbal Fluency, suggesting that PC 1  
395 captures most strongly the cognitive domain of executive function. More detailed information  
396 about each PC, with explained variance and corresponding coefficients, is provided in  
397 Appendix A, Table A.6, and Figures A.2 and A.3, respectively. Kruskal-Wallis test showed a  
398 statistically significant difference in PC 1 subject scores between genetic status groups ( $\chi^2(2)$   
399 = 256.02,  $p < 0.001$ ). As anticipated, post hoc Mann-Whitney tests confirmed significantly  
400 lower PC 1 subject scores, indicative of lower cognitive function, in symptomatic carriers  
401 compared to both pre-symptomatic carriers ( $U = 1461$ ,  $p < 0.001$ ) and non-carriers ( $U =$   
402 1182,  $p < 0.001$ ). No significant difference was observed between pre-symptomatic carriers  
403 and non-carriers ( $U = 36\ 318$ ,  $p = 0.480$ ).

404

405 Further regression analysis revealed a positive relationship between RSFA and  
406 cognitive function, specifically in IC 23, suggesting that individuals with higher CVR levels  
407 in left PFC performed better overall on a range of cognitive tests. In addition, a genetic status  
408 x RSFA interaction was observed in left PFC (IC 23), as well as in posterior parietal  
409 association areas (IC 17) and right lateral PFC (IC 21). The interaction effects, presented in  
410 Figure 4, highlight a stronger positive relationship between RSFA and cognitive function in  
411 mutation carriers, particularly in symptomatic individuals, than in non-carriers. ROIs analysis  
412 was overall consistent with component-based analysis (Figure 4). The output from the MLR

Impaired Cerebrovascular Reactivity in Genetic Frontotemporal Dementia

- 413 models assessing cognitive function in relation to RSFA indices across the sample and sub-
- 414 groups of interest can be consulted in Table 4.

Impaired Cerebrovascular Reactivity in Genetic Frontotemporal Dementia

**Table 4.** Multiple regression analysis results of cognition as a function of RSFA (model ' $Cognition_{PCI} \sim I + Genetic\ status * RSFA_{IC/Voxel} + Age + Sex + Handedness + Scanning\ Site$ ')

| Predictor                                          | Model | Sample                  |               |                 | NC versus SC |               |                 | PSC versus SC |               |                 | NC versus PSC |              |                 |
|----------------------------------------------------|-------|-------------------------|---------------|-----------------|--------------|---------------|-----------------|---------------|---------------|-----------------|---------------|--------------|-----------------|
|                                                    |       | Adjusted R <sup>2</sup> | $\beta$       | T               | P*           | $\beta$       | T               | P*            | $\beta$       | T               | P*            | $\beta$      | T               |
| <i>ICs based on Independent Component Analysis</i> |       |                         |               |                 |              |               |                 |               |               |                 |               |              |                 |
| <b>IC 4 – Posterior cingulate cortex/precuneus</b> |       |                         |               |                 |              |               |                 |               |               |                 |               |              |                 |
|                                                    |       | 0.52                    |               |                 |              |               |                 |               |               |                 |               |              |                 |
| Age                                                |       | <b>-0.43</b>            | <b>-14.10</b> | <b>&lt;.001</b> | <b>-0.23</b> | <b>-6.36</b>  | <b>&lt;.001</b> | <b>-0.30</b>  | <b>-7.69</b>  | <b>&lt;.001</b> | <b>-0.37</b>  | <b>-9.45</b> | <b>&lt;.001</b> |
| Genetic status                                     |       | <b>-0.40</b>            | <b>-13.07</b> | <b>&lt;.001</b> | <b>-0.68</b> | <b>-18.09</b> | <b>&lt;.001</b> | <b>-0.61</b>  | <b>-15.28</b> | <b>&lt;.001</b> | -0.01         | -0.19        | .851            |
| RSFA                                               |       | 0.04                    | 0.80          | .600            |              |               |                 |               |               |                 |               |              |                 |
| Genetic status*RSFA                                |       | 0.04                    | 1.43          | .339            |              |               |                 |               |               |                 |               |              |                 |
| <b>IC 17 – Posterior association areas</b>         |       |                         |               |                 |              |               |                 |               |               |                 |               |              |                 |
|                                                    |       | 0.52                    |               |                 |              |               |                 |               |               |                 |               |              |                 |
| Age                                                |       | <b>-0.44</b>            | <b>-14.23</b> | <b>&lt;.001</b> | <b>-0.23</b> | <b>-6.46</b>  | <b>&lt;.001</b> | <b>-0.30</b>  | <b>-7.67</b>  | <b>&lt;.001</b> | <b>-0.37</b>  | <b>-9.38</b> | <b>&lt;.001</b> |
| Genetic status                                     |       | <b>-0.40</b>            | <b>-13.05</b> | <b>&lt;.001</b> | <b>-0.68</b> | <b>18.21</b>  | <b>&lt;.001</b> | <b>-0.61</b>  | <b>-15.28</b> | <b>&lt;.001</b> | -0.01         | -0.29        | .769            |
| RSFA                                               |       | -0.01                   | -0.04         | .980            |              |               |                 |               |               |                 |               |              |                 |
| Genetic status*RSFA                                |       | <b>-0.08</b>            | <b>2.84</b>   | <b>.029</b>     | 0.04         | 1.33          | .183            | 0.02          | 0.53          | .600            | 0.07          | 1.77         | .078            |
| <b>IC 21 – Right lateral prefrontal cortex</b>     |       |                         |               |                 |              |               |                 |               |               |                 |               |              |                 |
|                                                    |       | 0.53                    |               |                 |              |               |                 |               |               |                 |               |              |                 |
| Age                                                |       | <b>-0.43</b>            | <b>-14.08</b> | <b>&lt;.001</b> | <b>-0.23</b> | <b>-6.55</b>  | <b>&lt;.001</b> | <b>-0.30</b>  | <b>-7.76</b>  | <b>&lt;.001</b> | <b>-0.37</b>  | <b>-9.40</b> | <b>&lt;.001</b> |
| Genetic status                                     |       | <b>-0.39</b>            | <b>-12.61</b> | <b>&lt;.001</b> | <b>-0.67</b> | <b>-17.74</b> | <b>&lt;.001</b> | <b>-0.60</b>  | <b>-14.73</b> | <b>&lt;.001</b> | -0.01         | -0.16        | .869            |
| RSFA                                               |       | 0.08                    | 2.06          | .124            |              |               |                 |               |               |                 |               |              |                 |
| Genetic status*RSFA                                |       | <b>0.09</b>             | <b>3.40</b>   | <b>.008</b>     | 0.05         | 1.91          | .057            | 0.02          | 0.64          | .523            | 0.05          | 1.26         | .207            |

Impaired Cerebrovascular Reactivity in Genetic Frontotemporal Dementia

**IC 23 – Left lateral prefrontal cortex**

|                     | 0.52         |               |                 |             |               |                 |              |               |                 |              |              |                 |
|---------------------|--------------|---------------|-----------------|-------------|---------------|-----------------|--------------|---------------|-----------------|--------------|--------------|-----------------|
| Age                 | <b>-0.40</b> | <b>-12.85</b> | <b>&lt;.001</b> | <b>0.22</b> | <b>-6.05</b>  | <b>&lt;.001</b> | <b>-0.29</b> | <b>-7.24</b>  | <b>&lt;.001</b> | <b>-0.36</b> | <b>-8.92</b> | <b>&lt;.001</b> |
| Genetic status      | <b>-0.38</b> | <b>-12.33</b> | <b>&lt;.001</b> | <b>0.67</b> | <b>-17.51</b> | <b>&lt;.001</b> | <b>-0.59</b> | <b>-14.28</b> | <b>&lt;.001</b> | -0.01        | -0.19        | .846            |
| RSFA                | <b>0.11</b>  | <b>2.88</b>   | <b>.029</b>     | 0.07        | 1.69          | .091            | 0.07         | 1.76          | .079            | 0.07         | 1.38         | .169            |
| Genetic status*RSFA | <b>0.08</b>  | <b>2.83</b>   | <b>.030</b>     | 0.01        | 0.21          | .831            | 0.03         | 1.06          | .289            | -0.04        | -0.90        | .367            |

*ROIs based on Voxel-wise Analysis*

**Left middle frontal gyrus**

|                     | 0.57         |               |                 |              |               |                 |              |               |                 |              |              |                 |
|---------------------|--------------|---------------|-----------------|--------------|---------------|-----------------|--------------|---------------|-----------------|--------------|--------------|-----------------|
| Age                 | <b>-0.38</b> | <b>-12.92</b> | <b>&lt;.001</b> | <b>-0.20</b> | <b>-6.01</b>  | <b>&lt;.001</b> | <b>-0.28</b> | <b>-7.58</b>  | <b>&lt;.001</b> | <b>-0.36</b> | <b>-9.17</b> | <b>&lt;.001</b> |
| Genetic status      | <b>-0.35</b> | <b>-11.51</b> | <b>&lt;.001</b> | <b>-0.60</b> | <b>-15.18</b> | <b>&lt;.001</b> | <b>0.53</b>  | <b>-12.82</b> | <b>&lt;.001</b> | -0.003       | -0.07        | .944            |
| RSFA                | <b>0.13</b>  | <b>4.42</b>   | <b>&lt;.001</b> | <b>0.10</b>  | <b>2.95</b>   | <b>.003</b>     | <b>0.14</b>  | <b>4.35</b>   | <b>&lt;.001</b> | -0.03        | -0.82        | .412            |
| Genetic status*RSFA | <b>0.23</b>  | <b>8.02</b>   | <b>&lt;.001</b> | <b>0.22</b>  | <b>6.60</b>   | <b>&lt;.001</b> | <b>0.16</b>  | <b>4.84</b>   | <b>&lt;.001</b> | 0.07         | 1.73         | .085            |

**Right middle frontal gyrus**

|                     | 0.54         |               |                 |              |               |                 |              |               |                 |              |              |                 |
|---------------------|--------------|---------------|-----------------|--------------|---------------|-----------------|--------------|---------------|-----------------|--------------|--------------|-----------------|
| Age                 | <b>-0.41</b> | <b>-13.76</b> | <b>&lt;.001</b> | <b>-0.24</b> | <b>-6.61</b>  | <b>&lt;.001</b> | <b>-0.30</b> | <b>-7.63</b>  | <b>&lt;.001</b> | <b>-0.37</b> | <b>-9.26</b> | <b>&lt;.001</b> |
| Genetic status      | <b>-0.37</b> | <b>-11.84</b> | <b>&lt;.001</b> | <b>-0.64</b> | <b>-15.63</b> | <b>&lt;.001</b> | <b>-0.58</b> | <b>-14.04</b> | <b>&lt;.001</b> | -0.003       | -0.07        | .943            |
| RSFA                | <b>0.11</b>  | <b>3.59</b>   | <b>.003</b>     | <b>0.07</b>  | <b>2.11</b>   | <b>.036</b>     | <b>0.07</b>  | <b>2.15</b>   | <b>.032</b>     | 0.05         | 1.12         | .261            |
| Genetic status*RSFA | <b>0.15</b>  | <b>5.25</b>   | <b>&lt;.001</b> | <b>0.07</b>  | <b>2.06</b>   | <b>.040</b>     | 0.04         | 1.30          | .195            | 0.05         | 1.23         | .220            |

**Left superior frontal gyrus**

|                | 0.54         |               |                 |              |               |                 |              |               |                 |              |              |                 |
|----------------|--------------|---------------|-----------------|--------------|---------------|-----------------|--------------|---------------|-----------------|--------------|--------------|-----------------|
| Age            | <b>-0.42</b> | <b>-13.88</b> | <b>&lt;.001</b> | <b>-0.23</b> | <b>-6.47</b>  | <b>&lt;.001</b> | <b>-0.30</b> | <b>-7.98</b>  | <b>&lt;.001</b> | <b>-0.37</b> | <b>-9.36</b> | <b>&lt;.001</b> |
| Genetic status | <b>-0.38</b> | <b>-12.10</b> | <b>&lt;.001</b> | <b>-0.64</b> | <b>-16.37</b> | <b>&lt;.001</b> | <b>-0.58</b> | <b>-13.94</b> | <b>&lt;.001</b> | -0.01        | -0.17        | .861            |
| RSFA           | <b>0.08</b>  | <b>2.49</b>   | <b>.054</b>     | 0.06         | 1.85          | .065            | 0.05         | 1.67          | .096            | -0.04        | -0.85        | .398            |

Impaired Cerebrovascular Reactivity in Genetic Frontotemporal Dementia

|                                     |              |               |                 |              |               |                 |              |               |                 |              |              |                 |
|-------------------------------------|--------------|---------------|-----------------|--------------|---------------|-----------------|--------------|---------------|-----------------|--------------|--------------|-----------------|
| Genetic status*RSFA                 | <b>0.14</b>  | <b>4.83</b>   | <b>&lt;.001</b> | <b>0.12</b>  | <b>3.57</b>   | <b>&lt;.001</b> | <b>0.09</b>  | <b>2.99</b>   | <b>.003</b>     | 0.002        | 0.06         | .951            |
| <b>Right superior frontal gyrus</b> |              |               |                 |              |               |                 |              |               |                 |              |              |                 |
|                                     | 0.54         |               |                 |              |               |                 |              |               |                 |              |              |                 |
| Age                                 | <b>-0.42</b> | <b>-14.05</b> | <b>&lt;.001</b> | <b>-0.23</b> | <b>-6.59</b>  | <b>&lt;.001</b> | <b>-0.30</b> | <b>-7.72</b>  | <b>&lt;.001</b> | <b>-0.37</b> | <b>-9.43</b> | <b>&lt;.001</b> |
| Genetic status                      | <b>-0.39</b> | <b>-12.64</b> | <b>&lt;.001</b> | <b>-0.67</b> | <b>-17.30</b> | <b>&lt;.001</b> | <b>-0.60</b> | <b>-14.64</b> | <b>&lt;.001</b> | -0.01        | -0.29        | .769            |
| RSFA                                | 0.03         | 0.82          | .610            |              |               |                 |              |               |                 |              |              |                 |
| Genetic status*RSFA                 | <b>0.15</b>  | <b>5.29</b>   | <b>&lt;.001</b> | <b>0.09</b>  | <b>2.91</b>   | <b>.004</b>     | 0.04         | 1.28          | .201            | 0.07         | 1.90         | .058            |

Cognitive function differences as a function of RSFA and genetic status following robust multiple linear regression analysis in ICA-based components (top panel) and several representative ROIs based on voxel-wise univariate analysis on RSFA maps (bottom panel). Cognitive function is represented by subjects' loading values for PC 1 following PCA on nine cognitive measures. Estimated regression parameters, t values, and *p* values are shown for main effects across the entire sample and sub-groups of interest where relevant. Models are adjusted for age, sex, handedness, and scanning site.

\**P*-values are FDR-corrected at the 0.05 level across the whole sample (all genetic status groups combined). Bold numbers indicate that *p* values are statistically significant.

Abbreviations: NC, non-carrier; PSC, pre-symptomatic mutation carrier; SC, symptomatic mutation carrier.

415

416

#### 4. Discussion

417

418

419

420

421

422

423

We confirmed that cerebrovascular function, as measured by the resting-state fluctuation amplitudes, is reduced by mutations associated with frontotemporal dementia even in the long pre-symptomatic period. The RSFA differences worsened with disease progression and correlated with cognition in mutation carriers, over and above the effects of ageing. We propose that cerebrovascular dysfunction in genetic FTD represents an early dysregulated feature in the disease's pathophysiology, which may interact with neurodegenerative changes.

424

425 **4.1. Regional Distribution of Cerebrovascular Reactivity Impairment in FTD**

426 Progressive reductions in RSFA were observed in mutation carriers versus non-  
427 carriers in ventromedial and dorsolateral prefrontal cortical areas, cingulate and parietal  
428 cortex. Comparable CVR decreases using the RSFA approach are reported in healthy ageing  
429 and acute conditions of microvascular impairment, particularly in prefrontal and superior-  
430 parietal cortical areas [28, 29, 33] that are vulnerable to lower cerebral blood flow [26, 53,  
431 54] and the principal FTD-specific pathological burden. This regional vulnerability aligns  
432 with the observation of abnormal vasoreactivity in the default mode network (DMN) in AD  
433 [18, 19, 32, 55]. In genetic FTD, we found consistent CVR reductions in frontal cortex,  
434 anterior cingulate, and insula – regions accordant with atrophy [2, 35, 56, 57] and cerebral  
435 perfusion decreases [8, 9, 58] in pre-symptomatic and symptomatic carriers. These areas are  
436 part of the salience network, which underlies cognitive, sensory, and affective regulation,  
437 language, motor control, and social conduct, each functionally impaired in symptomatic FTD  
438 [59, 60].

439 We argue that the observed cerebrovascular dysfunction in FTD represents an early  
440 dysregulated pathophysiology, interacting with regional neurodegenerative changes, as  
441 postulated in AD [61-63]. Potential causes for the CVR decreases include pH dysregulation  
442 and impaired modulation of nitric oxide, which may diminish endothelium-dependent dilator  
443 responses and the dynamic range of the BOLD signal [16, 64, 65]. Alterations in the  
444 neurovascular unit, including dysfunctional vascular endothelium, hypercontractile vascular  
445 smooth muscle cells [62], depleted pericytes [5], and activated microglia [6] have been  
446 documented in familial FTD. Given the close interrelatedness between neurons and cerebral  
447 microvessels, such changes likely compromise the function of the blood-brain barrier,

Impaired Cerebrovascular Reactivity in Genetic Frontotemporal Dementia

448 diminish brain perfusion, and trigger the aggregation of aberrant circulating proteins and  
449 secretion of pro-inflammatory factors, accelerating neurodegeneration [61, 62]. These  
450 findings underscore the need for further research to discern the relationship between  
451 cerebrovascular dysfunction and neurodegenerative processes in FTD and other  
452 neurodegenerative pathologies.

453         While the RSFA variances in inferior frontal, parietal, and precuneus (IC 4 and IC 17)  
454 accord with FTD-related hypoperfusion and atrophy profiles, the notable RSFA reductions in  
455 dorsolateral prefrontal cortex (IC 21 and IC 23) are intriguing. These regions are not  
456 commonly associated with hypoperfusion and atrophy in early FTD. This discrepancy implies  
457 a shared pathway leading to CVR impairment, hypoperfusion, and atrophy in inferior frontal  
458 and parietal regions. However, the mechanisms underlying the distinct CVR effects in  
459 dorsolateral frontal regions in FTD and the processes that interact with these changes prompt  
460 further investigation.

461         Such CVR alterations develop in the long pre-symptomatic window and increase with  
462 age in mutation carriers faster than in non-carriers. This suggests less effective dampening of  
463 arterial pressure pulsations through the vascular tree (i.e., diminished Windkessel effect)  
464 owing to increased arterial stiffening [26], which could influence the BOLD signal  
465 fluctuation in neighbouring tissue, including WM and CSF [66]. Such an interpretation  
466 supports previously reported RSFA increases near cerebral ventricles and vascular territories,  
467 and likely reflects the cardiovascular contribution to the RSFA signal in ageing [26, 28]. It is  
468 also plausible that the RSFA signal in ICA-identified regions captures multiple sources with  
469 different aetiology, particularly at boundaries of large vessels and adjacent perivascular  
470 space, that may exhibit different spontaneous brain activity at rest [67]. The latter illustrates  
471 the challenge of dissociating spatially overlapping sources of signal using univariate methods

472 and motivate the use of data-driven and multimodal approaches [68], as underscored by our  
473 findings.

474         Although we observed diminished CVR in signature FTD frontal and parietal areas,  
475 no substantial RSFA decreases in temporal regions were found. Given the involvement of the  
476 temporal lobes, especially in *MAPT* mutations [8, 35, 56], this result may be due to type II  
477 error or the much smaller size of the *MAPT* group than the *C9orf72* and *GRN* groups. We  
478 compared the RSFA-IC loadings and RSFA-ROI estimates based on gene mutation but did  
479 not discover any significant between-group effects. This null result may be caused by small  
480 and unbalanced sub-groups per mutated gene but may also imply true commonalities in the  
481 vascular pathology downstream of the mutations' molecular pathology. Previous  
482 neuroimaging studies have revealed gene mutation-specific brain changes in FTD [56, 69].  
483 The CVR changes in frontal regions may reflect distinct mechanisms from the atrophy and  
484 perfusion alterations in temporal areas discovered in earlier FTD investigations. In line with  
485 this assumption, different CVR and CBF patterns have been documented in AD, with CVR  
486 deficits in prefrontal, anterior cingulate, and insular cortex proposed as direct indicators of  
487 vascular dysfunction, and CBF decreases in temporal and parietal cortices attributed to  
488 atrophy-related lower metabolic demand [55]. Our results could denote a similar mechanism  
489 whereby CVR impairment contributes to FTD disease progression both independently and  
490 conjointly with other pathophysiological processes.

#### 491         **4.2. Relationship between Cerebrovascular Impairment and Cognition**

492         As a secondary objective, we examined the behavioural relevance of CVR alterations  
493 and found a relationship between RSFA reductions in mutation carriers and diminished  
494 cognitive function. This broadly confirmed the link between CVR decreases and impaired  
495 overall cognitive status, as previously shown in mild cognitive impairment (MCI) and AD



496 [19], and conditions that may alter the risk of dementia [33]. Furthermore, CVR impairment  
497 predicts global cognitive performance independently of AD pathological markers, such as  
498 CSF-derived  $\beta$ -amyloid42 ( $A\beta$ 42) and tau in healthy elderly and subjects with mixed  
499 Alzheimer's and vascular cognitive impairment and dementia [70].

500 We observed an association between higher RSFA and better global cognitive  
501 function, especially in symptomatic mutation carriers, pronounced in prefrontal cortical areas  
502 – an effect that remained after adjusting for age and disease progression effects. This accords  
503 with evidence from ageing, AD, and FTD studies about the increased dependence of  
504 successful cognition on precisely regulated function within and between large-scale brain  
505 networks [71-74]. Furthermore, progressively stronger coupling between function and  
506 cognition is described in pre-symptomatic mutation carriers from the GENFI cohort as they  
507 approached their expected age of disease onset, in the absence of differences in cognitive  
508 performance relative to non-carriers [57]. Therefore, our observations support previous  
509 research and suggest that CVR may benefit cognition in FTD at-risk individuals.

510 CVR impairment in DMN regions did not correlate with cognition. This implies that  
511 the CVR changes in default network may not relate directly to the neuropathological  
512 processes or disease progression and may instead be influenced by other factors that  
513 modulate CVR, such as medications, as shown in ageing [75]. The nature of default network  
514 CVR changes and its implications for DMN suppression in neurodegeneration remains to be  
515 fully defined. However, findings on default network from fMRI BOLD studies should not be  
516 interpreted independently of cerebrovascular variations induced by physiological modulators  
517 [26].

### 518 **4.3. Methodological Considerations and Future Directions**

519           Several methodological remarks warrant consideration. Firstly, our design was cross-  
520 sectional, so any causal inferences about the associations remain to be addressed in  
521 longitudinal analyses. Second, several of the described effects only approached statistical  
522 significance, which could imply that the FDR multiple comparison correction was  
523 conservative. In the voxel-based analysis, no differences emerged between pre-symptomatic  
524 carriers and non-carriers. Despite that, the distribution of CVR effects in pre-symptomatic  
525 carriers resembled that of symptomatic cases, highlighting the vulnerability of the middle  
526 frontal and posterior cortical areas. Third, we recognise that RSFA-CVR is just one measure  
527 of cerebrovascular health. Previous examinations using the RSFA method have documented  
528 that RSFA relates to CBF effects, white matter hyperintensities (WMHs), and cardiovascular  
529 factors [26]. Thus, future investigations in the GENFI sample should clarify which vascular  
530 factors drive the RSFA changes reported here by adopting other means to quantify  
531 cerebrovascular function, such as resting arterial-spin labelling (ASL)-CBF and WMH  
532 burden on MRI. Another avenue for future efforts is to complement current analyses with  
533 estimates of functional and WM integrity, as well as CSF and blood markers in relation to  
534 cognitive decline [29] in a multi-modal manner [68, 75]. On a clinical level, using integrative  
535 approaches to uncover protective factors in prodromal stages of disease may improve  
536 prognosis and inform stratification procedures, future triallists, patients, and carers.

## 537           **5. Concluding Remarks**

538           Using the RSFA approach, we found CVR alterations in pre-symptomatic and  
539 symptomatic FTD with a pronounced frontal cortical predilection, concordant across  
540 component-based and voxel-level analyses. We also showed that higher CVR yields a  
541 cognitive benefit, especially in subjects at elevated FTD risk. These results demonstrate that  
542 RSFA can be used as a safe, tolerable, and clinically informative signal that can aid the

Impaired Cerebrovascular Reactivity in Genetic Frontotemporal Dementia

543 quantification of cerebrovascular health in large-scale population studies among frail  
544 participants. We suggest that there is a vascular contribution that interacts with FTD  
545 pathology in driving disease expression and progression. Cerebrovascular health may be a  
546 potential target for biomarker identification and a modifiable factor, to mitigate against  
547 clinical deterioration in people at genetic risk of frontotemporal dementia.

548

549 **Acknowledgements**

550 The authors would like to thank the participant volunteers and their families for  
551 their contribution to this research. We also thank Hamid Azimi for technical assistance,  
552 as well as all radiographers/technicians and research nurses from all research sites  
553 involved in this study for their invaluable support in data acquisition.

554

555 **Declaration of Interest**

556 All authors have no conflicts of interest. Untreated to this there are several  
557 disclosures.

558

559 **Sources of Funding**

560 K.A.T. was supported by Fellowship awards from the Guarantors of Brain  
561 (G101149) and Alzheimer's Society, UK (grant number 602). J.B.R. has received  
562 funding from the Wellcome Trust (103838; 220258) and is supported by the Cambridge  
563 University Centre for Frontotemporal Dementia, the Medical Research Council  
564 (MC\_UU\_00030/14; MR/T033371/1 ) and the National Institute for Health Research  
565 Cambridge Biomedical Research Centre (NIHR203312: BRC-1215-20014) and the Holt  
566 Fellowship. The views expressed are those of the authors and not necessarily those of  
567 the NIHR or the Department of Health and Social Care. J.C.V.S., L.C.J. and H.S. are  
568 supported by the Dioraphte Foundation grant 09-02-03-00, Association for  
569 Frontotemporal Dementias Research Grant 2009, Netherlands Organisation for  
570 Scientific Research grant HCM1 056-13-018, ZonMw Memorabel (Deltaplan Dementie,  
571 project number 733 051 042), ZonMw Onderzoeksprogramma Dementie (YOD-  
572 INCLUDED, project number 10510032120002), EU Joint Programme-  
573 Neurodegenerative Disease Research-GENFI-PROX, Alzheimer Nederland and the

Impaired Cerebrovascular Reactivity in Genetic Frontotemporal Dementia

574 Bluefield Project. R.S-V. is supported by Alzheimer’s Research UK Clinical Research  
575 Training Fellowship (ARUK-CRF2017B-2) and has received funding from Fundació  
576 Marató de TV3, Spain (grant no. 20143810). C.G. received funding from EU Joint  
577 Programme-Neurodegenerative Disease Research-Prefrontals Vetenskapsrådet Dnr 529-  
578 2014-7504, EU Joint Programme-Neurodegenerative Disease Research-GENFI-PROX,  
579 Vetenskapsrådet 2019-0224, Vetenskapsrådet 2015-02926, Vetenskapsrådet 2018-  
580 02754, the Swedish FTD Initiative-Schörling Foundation, Alzheimer Foundation, Brain  
581 Foundation, Dementia Foundation and Region Stockholm ALF-project. D.G. received  
582 support from the EU Joint Programme-Neurodegenerative Disease Research and the  
583 Italian Ministry of Health (PreFrontALS) grant 733051042. R.V. has received funding  
584 from the Mady Browaeys Fund for Research into Frontotemporal Dementia. J.L.  
585 received funding for this work by the Deutsche Forschungsgemeinschaft German  
586 Research Foundation under Germany’s Excellence Strategy within the framework of the  
587 Munich Cluster for Systems Neurology (EXC 2145 SyNergy—ID 390857198). M.O.  
588 has received funding from Germany’s Federal Ministry of Education and Research  
589 (BMBF). E.F. has received funding from a Canadian Institute of Health Research grant  
590 #327387. M.M. has received funding from a Canadian Institute of Health Research  
591 operating grant and the Weston Brain Institute and Ontario Brain Institute. F.M. is  
592 supported by the Tau Consortium and has received funding from the Carlos III Health  
593 Institute (PI19/01637). J.D.R. is supported by the Bluefield Project and the National  
594 Institute for Health and Care Research University College London Hospitals Biomedical  
595 Research Centre and has received funding from an MRC Clinician Scientist Fellowship  
596 (MR/M008525/1) and a Miriam Marks Brain Research UK Senior Fellowship. Several  
597 authors of this publication (J.C.V.S., M.S., R.V., A.d.M., M.O., R.V., J.D.R.) are  
598 members of the European Reference Network for Rare Neurological Diseases (ERN-

Impaired Cerebrovascular Reactivity in Genetic Frontotemporal Dementia

599 RND) - Project ID No 739510. This work was also supported by the EU Joint  
600 Programme-Neurodegenerative Disease Research GENFI-PROX grant [2019-02248; to  
601 J.D.R., M.O., B.B., C.G., J.C.V.S. and M.S. For the purpose of open access, the author  
602 has applied a CC BY public copyright licence to any Author Accepted Manuscript  
603 version arising from this submission.

604

605

606 JBR is a non-remunerated trustee of the Guarantors of Brain, Darwin College,  
607 and the PSP Association; he provides consultancy to Alzheimer Research UK,  
608 Asceneuron, Alector, Biogen, CuraSen, CumulusNeuro, UCB, SV Health, and Wave,  
609 and has research grants from AZ-Medimmune, Janssen, Lilly as industry partners in the  
610 Dementias Platform UK.

611

612

613

614

615

616

617

618

619

620

621

622

623

624

625

626

627

628

629

630

631

632

633

634

635

636

**References:**

637

1. Coyle-Gilchrist IT, Dick KM, Patterson K, Vázquez Rodríguez P, Wehmann E, Wilcox A, Lansdall CJ, Dawson KE, Wiggins J, Mead S, Brayne C. Prevalence, characteristics, and survival of frontotemporal lobar degeneration syndromes.

638

639

640

Neurology. 2016 May 3;86(18):1736-43. [https://doi.org/10.1007/S00415-019-](https://doi.org/10.1007/S00415-019-09363-4)

641

[09363-4](https://doi.org/10.1007/S00415-019-09363-4)

642

2. Greaves CV, Rohrer JD. An update on genetic frontotemporal dementia. Journal

643

of neurology. 2019 Aug 1;266(8):2075-86.

644

<https://doi.org/10.1007/s00415-019-09363-4>

645

3. Meeter LH, Kaat LD, Rohrer JD, Van Swieten JC. Imaging and fluid biomarkers in frontotemporal dementia. Nature Reviews Neurology. 2017 Jul;13(7):406-19.

646

647

<https://doi.org/10.1038/nrneurol.2017.75>

648

4. Raz L, Knoefel J, Bhaskar K. The neuropathology and cerebrovascular mechanisms of dementia. Journal of Cerebral Blood Flow & Metabolism. 2016

649

650

Jan;36(1):172-86. <https://doi.org/10.1038/jcbfm.2015.164>

651

5. Gerrits E, Giannini LA, Brouwer N, Melhem S, Seilhean D, Le Ber I, Brainbank Neuro-CEB Neuropathology Network, Kamermans A, Kooij G, de Vries HE, Boddeke EW. Neurovascular dysfunction in GRN-associated frontotemporal dementia identified by single-nucleus RNA sequencing of human cerebral cortex.

652

653

654

Nature neuroscience. 2022 Aug;25(8):1034-48. [https://doi.org/10.1038/s41593-](https://doi.org/10.1038/s41593-022-01124-3)

655

[022-01124-3](https://doi.org/10.1038/s41593-022-01124-3)

656

6. Malpetti M, Rittman T, Jones PS, Cope TE, Passamonti L, Bevan-Jones WR, Patterson K, Fryer TD, Hong YT, Aigbirhio FI, O'Brien JT. In vivo PET imaging of neuroinflammation in familial frontotemporal dementia. Journal of Neurology,

657

658

659

Impaired Cerebrovascular Reactivity in Genetic Frontotemporal Dementia

- 660                   Neurosurgery & Psychiatry. 2020 Oct 29. [https://doi.org/10.1136/jnnp-2020-](https://doi.org/10.1136/jnnp-2020-323698)  
661                   [323698](https://doi.org/10.1136/jnnp-2020-323698)
- 662                   **7.** Du AT, Jahng GH, Hayasaka S, Kramer JH, Rosen HJ, Gorno-Tempini ML,  
663                   Rankin KP, Miller BL, Weiner MW, Schuff N. Hypoperfusion in frontotemporal  
664                   dementia and Alzheimer disease by arterial spin labeling MRI. *Neurology*. 2006  
665                   Oct 10;67(7):1215-20.
- 666                   **8.** Mutsaerts HJ, Mirza SS, Petr J, Thomas DL, Cash DM, Bocchetta M, De Vita E,  
667                   Metcalf AW, Shirzadi Z, Robertson AD, Tartaglia MC. Cerebral perfusion  
668                   changes in presymptomatic genetic frontotemporal dementia: a GENFI study.  
669                   *Brain*. 2019 Apr 1;142(4):1108-20. <https://doi.org/10.1093/brain/awz039>
- 670                   **9.** Dopfer EG, Chalos V, Ghariq E, den Heijer T, Hafkemeijer A, Jiskoot LC, de  
671                   Koning I, Seelaar H, van Minkelen R, van Osch MJ, Rombouts SA. Cerebral  
672                   blood flow in presymptomatic MAPT and GRN mutation carriers: a longitudinal  
673                   arterial spin labeling study. *NeuroImage: Clinical*. 2016 Feb 1;12:460-5.  
674                   <https://doi.org/10.1016/j.nicl.2016.08.001>
- 675                   **10.** Thal DR, von Arnim CA, Griffin WS, Mrak RE, Walker L, Attems J, Arzberger  
676                   T. Frontotemporal lobar degeneration FTLT-tau: preclinical lesions, vascular, and  
677                   Alzheimer-related co-pathologies. *Journal of neural transmission*. 2015  
678                   Jul;122:1007-18. <https://doi.org/10.1007/s00702-014-1360-6>
- 679                   **11.** Willie CK, Tzeng YC, Fisher JA, Ainslie PN. Integrative regulation of human  
680                   brain blood flow. *The Journal of physiology*. 2014 Mar 1;592(5):841-59.  
681                   <https://doi.org/10.1113/jphysiol.2013.268953>
- 682                   **12.** Jensen KE, Thomsen C, Henriksen O. In vivo measurement of intracellular pH in  
683                   human brain during different tensions of carbon dioxide in arterial blood. *A*



Impaired Cerebrovascular Reactivity in Genetic Frontotemporal Dementia

- 684 31P-NMR study. *Acta physiologica scandinavica*. 1988 Oct;134(2):295-8.  
685 <https://doi.org/10.1111/j.1748-1716.1988.tb08492.x>
- 686 **13.** Lassen NA. Brain extracellular pH: the main factor controlling cerebral blood  
687 flow. *Scandinavian journal of clinical and laboratory investigation*. 1968 Jan  
688 1;22(4):247-51.
- 689 **14.** Reich T, Rusinek H. Cerebral cortical and white matter reactivity to carbon  
690 dioxide. *Stroke*. 1989 Apr;20(4):453-7. <https://doi.org/10.1161/01.STR.20.4.453>
- 691 **15.** Tsuda Y, Hartmann A. Changes in hyperfrontality of cerebral blood flow and  
692 carbon dioxide reactivity with age. *Stroke*. 1989 Dec;20(12):1667-73.  
693 <https://doi.org/10.1161/01.STR.20.12.1667>
- 694 **16.** Brandes RP, Fleming I, Busse R. Endothelial aging. *Cardiovascular research*.  
695 2005 May 1;66(2):286-94. <https://doi.org/10.1016/j.cardiores.2004.12.027>
- 696 **17.** Haight TJ, Bryan RN, Erus G, Davatzikos C, Jacobs DR, D'Esposito M, Lewis  
697 CE, Launer LJ. Vascular risk factors, cerebrovascular reactivity, and the default-  
698 mode brain network. *Neuroimage*. 2015 Jul 15;115:7-16.  
699 <https://doi.org/10.1016/j.neuroimage.2015.04.039>
- 700 **18.** Cantin S, Villien M, Moreaud O, Tropres I, Keignart S, Chipon E, Le Bas JF,  
701 Warnking J, Krainik A. Impaired cerebral vasoreactivity to CO<sub>2</sub> in Alzheimer's  
702 disease using BOLD fMRI. *Neuroimage*. 2011 Sep 15;58(2):579-87.  
703 <https://doi.org/10.1016/j.neuroimage.2011.06.070>
- 704 **19.** Richiardi J, Monsch AU, Haas T, Barkhof F, Van de Ville D, Radü EW, Kressig  
705 RW, Haller S. Altered cerebrovascular reactivity velocity in mild cognitive  
706 impairment and Alzheimer's disease. *Neurobiology of aging*. 2015 Jan  
707 1;36(1):33-41. <https://doi.org/10.1016/j.neurobiolaging.2014.07.020>

Impaired Cerebrovascular Reactivity in Genetic Frontotemporal Dementia

- 708           **20.** Birn RM, Diamond JB, Smith MA, Bandettini PA. Separating respiratory-  
709           variation-related fluctuations from neuronal-activity-related fluctuations in fMRI.  
710           Neuroimage.                   2006                   Jul                   15;31(4):1536-48.  
711           <https://doi.org/10.1016/j.neuroimage.2006.02.048>
- 712           **21.** Shmueli K, van Gelderen P, de Zwart JA, Horovitz SG, Fukunaga M, Jansma JM,  
713           Duyn JH. Low-frequency fluctuations in the cardiac rate as a source of variance  
714           in the resting-state fMRI BOLD signal. Neuroimage. 2007 Nov 1;38(2):306-20.  
715           Shmueli K, van Gelderen P, de Zwart JA, Horovitz SG, Fukunaga M, Jansma JM,  
716           Duyn JH. Low-frequency fluctuations in the cardiac rate as a source of variance  
717           in the resting-state fMRI BOLD signal. Neuroimage. 2007 Nov 1;38(2):306-20.  
718           <https://doi.org/10.1016/j.neuroimage.2007.07.037>
- 719           **22.** Golestani AM, Wei LL, Chen JJ. Quantitative mapping of cerebrovascular  
720           reactivity using resting-state BOLD fMRI: validation in healthy adults.  
721           Neuroimage.                   2016                   Sep                   1;138:147-63.  
722           <https://doi.org/10.1016/j.neuroimage.2016.05.025>
- 723           **23.** Kannurpatti SS, Biswal BB. Detection and scaling of task-induced fMRI-BOLD  
724           response using resting state fluctuations. Neuroimage. 2008 May 1;40(4):1567-  
725           74. <https://doi.org/10.1016/j.neuroimage.2007.09.040>
- 726           **24.** Liu P, Li Y, Pinho M, Park DC, Welch BG, Lu H. Cerebrovascular reactivity  
727           mapping without gas challenges. Neuroimage. 2017 Feb 1;146:320-6.
- 728           **25.** Rostrup E, Larsson HB, Toft PB, Garde K, Thomsen C, Ring P, S ndergaard L,  
729           Henriksen O. Functional MRI of CO2 induced increase in cerebral perfusion.  
730           NMR                   in                   Biomedicine.                   1994                   Mar;7(1-2):29-34.  
731           <https://doi.org/10.1002/nbm.1940070106>

- 732           **26.** Tsvetanov KA, Henson RN, Rowe JB. Separating vascular and neuronal effects  
733           of age on fMRI BOLD signals. *Philosophical Transactions of the Royal Society*  
734           B. 2021 Jan 4;376(1815):20190631. <https://doi.org/10.1098/rstb.2019.0631>
- 735           **27.** Kannurpatti SS, Motes MA, Biswal BB, Rypma B. Assessment of unconstrained  
736           cerebrovascular reactivity marker for large age-range FMRI studies. *PloS one*.  
737           2014 Feb 13;9(2):e88751. <https://doi.org/10.1371/journal.pone.0088751>
- 738           **28.** Tsvetanov KA, Henson RN, Tyler LK, Davis SW, Shafto MA, Taylor JR,  
739           Williams N, Rowe JB. The effect of ageing on fMRI: Correction for the  
740           confounding effects of vascular reactivity evaluated by joint fMRI and MEG in  
741           335 adults. *Human brain mapping*. 2015 Jun;36(6):2248-69.  
742           <https://doi.org/10.1002/hbm.22768>
- 743           **29.** Tsvetanov KA, Henson RN, Jones PS, Mutsaerts H, Fuhrmann D, Tyler LK,  
744           CamCAN, Rowe JB. The effects of age on resting-state BOLD signal  
745           variability is explained by cardiovascular and cerebrovascular factors.  
746           *Psychophysiology*. 2021 Jul;58(7):e13714. <https://doi.org/10.1111/psyp.13714>
- 747           **30.** Su J, Wang M, Ban S, Wang L, Cheng X, Hua F, Tang Y, Zhou H, Zhai Y, Du X,  
748           Liu J. Relationship between changes in resting-state spontaneous brain activity  
749           and cognitive impairment in patients with CADASIL. *The Journal of Headache*  
750           and Pain. 2019 Dec;20:1-1. <https://doi.org/10.1186/s10194-019-0982-3>
- 751           **31.** Nair VA, Raut RV, Prabhakaran V. Investigating the blood oxygenation level-  
752           dependent functional MRI response to a verbal fluency task in early stroke before  
753           and after hemodynamic scaling. *Frontiers in Neurology*. 2017 Jun 19;8:283.  
754           <https://doi.org/10.3389/fneur.2017.00283>
- 755           **32.** Millar PR, Ances BM, Gordon BA, Benzinger TL, Fagan AM, Morris JC, Balota  
756           DA. Evaluating resting-state BOLD variability in relation to biomarkers of

Impaired Cerebrovascular Reactivity in Genetic Frontotemporal Dementia

- 757 preclinical Alzheimer's disease. *Neurobiology of aging*. 2020 Dec 1;96:233-45.  
758 <https://doi.org/10.1016/j.neurobiolaging.2020.08.007>
- 759 **33.** Tsvetanov KA, Spindler LR, Stamatakis EA, Newcombe VF, Lupson VC,  
760 Chatfield DA, Manktelow AE, Outtrim JG, Elmer A, Kingston N, Bradley JR.  
761 Hospitalisation for COVID-19 predicts long lasting cerebrovascular impairment:  
762 A prospective observational cohort study. *NeuroImage: Clinical*. 2022 Jan  
763 1;36:103253. <https://doi.org/10.1016/j.nicl.2022.103253>
- 764 **34.** Morris JC, Weintraub S, Chui HC, Cummings J, DeCarli C, Ferris S, Foster NL,  
765 Galasko D, Graff-Radford N, Peskind ER, Beekly D. The Uniform Data Set  
766 (UDS): clinical and cognitive variables and descriptive data from Alzheimer  
767 Disease Centers. *Alzheimer Disease & Associated Disorders*. 2006 Oct  
768 1;20(4):210-6. <https://doi.org/10.1097/01.wad.0000213865.09806.92>
- 769 **35.** Rohrer JD, Nicholas JM, Cash DM, Van Swieten J, Dopper E, Jiskoot L, Van  
770 Minkelen R, Rombouts SA, Cardoso MJ, Clegg S, Espak M. Presymptomatic  
771 cognitive and neuroanatomical changes in genetic frontotemporal dementia in the  
772 Genetic Frontotemporal dementia Initiative (GENFI) study: a cross-sectional  
773 analysis. *The Lancet Neurology*. 2015 Mar 1;14(3):253-62.  
774 [https://doi.org/10.1016/S1474-4422\(14\)70324-2](https://doi.org/10.1016/S1474-4422(14)70324-2)
- 775 **36.** Van Buuren S, Groothuis-Oudshoorn K. mice: Multivariate imputation by  
776 chained equations in R. *Journal of statistical software*. 2011 Dec 12;45:1-67.  
777 <https://doi.org/10.18637/jss.v045.i03>
- 778 **37.** Jenkinson M, Beckmann CF, Behrens TE, Woolrich MW, Smith SM. Fsl.  
779 *Neuroimage*. 2012 Aug 15;62(2):782-90.  
780 <https://doi.org/10.1016/j.neuroimage.2011.09.015>

- 781           **38.** Smith SM, Jenkinson M, Woolrich MW, Beckmann CF, Behrens TE, Johansen-  
782           Berg H, Bannister PR, De Luca M, Drobnjak I, Flitney DE, Niazy RK. Advances  
783           in functional and structural MR image analysis and implementation as FSL.  
784           Neuroimage.                   2004                   Jan                   1;23:S208-19.  
785           <https://doi.org/10.1016/j.neuroimage.2004.07.051>
- 786           **39.** Penny WD, Friston KJ, Ashburner JT, Kiebel SJ, Nichols TE, editors. Statistical  
787           parametric mapping: the analysis of functional brain images. Elsevier; 2011 Apr  
788           28.
- 789           **40.** Jenkinson M, Bannister P, Brady M, Smith S. Improved optimization for the  
790           robust and accurate linear registration and motion correction of brain images.  
791           Neuroimage. 2002 Oct 1;17(2):825-41. <https://doi.org/10.1006/nimg.2002.1132>
- 792           **41.** Pruim RH, Mennes M, van Rooij D, Llera A, Buitelaar JK, Beckmann CF. ICA-  
793           AROMA: A robust ICA-based strategy for removing motion artifacts from fMRI  
794           data.           Neuroimage.                   2015                   May                   15;112:267-77.  
795           <https://doi.org/10.1016/j.neuroimage.2015.02.064>
- 796           **42.** Geerligs L, Tsvetanov KA, Henson RN. Challenges in measuring individual  
797           differences in functional connectivity using fMRI: the case of healthy aging.  
798           Human           brain           mapping.                   2017                   Aug;38(8):4125-56.  
799           <https://doi.org/10.1002/hbm.23653>
- 800           **43.** Satterthwaite TD, Elliott MA, Gerraty RT, Ruparel K, Loughhead J, Calkins ME,  
801           Eickhoff SB, Hakonarson H, Gur RC, Gur RE, Wolf DH. An improved  
802           framework for confound regression and filtering for control of motion artifact in  
803           the preprocessing of resting-state functional connectivity data. Neuroimage. 2013  
804           Jan 1;64:240-56. <https://doi.org/10.1016/j.neuroimage.2012.08.052>

- 805           **44.** Xu L, Groth KM, Pearlson G, Schretlen DJ, Calhoun VD. Source-based  
806           morphometry: The use of independent component analysis to identify gray matter  
807           differences with application to schizophrenia. *Human brain mapping*. 2009  
808           Mar;30(3):711-24. <https://doi.org/10.1002/hbm.20540>
- 809           **45.** Hui M, Li J, Wen X, Yao L, Long Z. An empirical comparison of information-  
810           theoretic criteria in estimating the number of independent components of fMRI  
811           data. *PloS one*. 2011 Dec 27;6(12):e29274.  
812           <https://doi.org/10.1371/journal.pone.0029274>
- 813           **46.** Li YO, Adalı T, Calhoun VD. Estimating the number of independent components  
814           for functional magnetic resonance imaging data. *Human brain mapping*. 2007  
815           Nov;28(11):1251-66. <https://doi.org/10.1002/hbm.20359>
- 816           **47.** Rissanen J. Modeling by shortest data description. *Automatica*. 1978 Sep  
817           1;14(5):465-71. [https://doi.org/10.1016/0005-1098\(78\)90005-5](https://doi.org/10.1016/0005-1098(78)90005-5)
- 818           **48.** Himberg J, Hyvärinen A, Esposito F. Validating the independent components of  
819           neuroimaging time series via clustering and visualization. *Neuroimage*. 2004 Jul  
820           1;22(3):1214-22. <https://doi.org/10.1016/j.neuroimage.2004.03.027>
- 821           **49.** Millar PR, Petersen SE, Ances BM, Gordon BA, Benzinger TL, Morris JC,  
822           Balota DA. Evaluating the sensitivity of resting-state BOLD variability to age and  
823           cognition after controlling for motion and cardiovascular influences: a network-  
824           based approach. *Cerebral Cortex*. 2020 Nov;30(11):5686-701.  
825           <https://doi.org/10.1093/cercor/bhaa138>
- 826           **50.** Moore KM, Nicholas J, Grossman M, McMillan CT, Irwin DJ, Massimo L, Van  
827           Deerlin VM, Warren JD, Fox NC, Rossor MN, Mead S. Age at symptom onset  
828           and death and disease duration in genetic frontotemporal dementia: an

- 829 international retrospective cohort study. *The Lancet Neurology*. 2020 Feb  
830 1;19(2):145-56. [https://doi.org/10.1016/S1474-4422\(19\)30394-1](https://doi.org/10.1016/S1474-4422(19)30394-1)
- 831 **51.** Chen J, Liu J, Calhoun VD, Arias-Vasquez A, Zwiers MP, Gupta CN, Franke B,  
832 Turner JA. Exploration of scanning effects in multi-site structural MRI studies.  
833 *Journal of neuroscience methods*. 2014 Jun 15;230:37-50.  
834 <https://doi.org/10.1016/j.jneumeth.2014.04.023>
- 835 **52.** Faria AV, Joel SE, Zhang Y, Oishi K, van Zijl PC, Miller MI, Pekar JJ, Mori S.  
836 Atlas-based analysis of resting-state functional connectivity: Evaluation for  
837 reproducibility and multi-modal anatomy–function correlation studies.  
838 *Neuroimage*. 2012 Jul 2;61(3):613-21.  
839 <https://doi.org/10.1016/j.neuroimage.2012.03.078>
- 840 **53.** Flück D, Beaudin AE, Steinback CD, Kumarpillai G, Shobha N, McCreary CR,  
841 Peca S, Smith EE, Poulin MJ. Effects of aging on the association between  
842 cerebrovascular responses to visual stimulation, hypercapnia and arterial stiffness.  
843 *Frontiers in physiology*. 2014 Feb 19;5:49.  
844 <https://doi.org/10.3389/fphys.2014.00049>
- 845 **54.** Hosp JA, Dressing A, Blazhenets G, Bormann T, Rau A, Schwabenland M,  
846 Thurow J, Wagner D, Waller C, Niesen WD, Frings L. Cognitive impairment and  
847 altered cerebral glucose metabolism in the subacute stage of COVID-19. *Brain*.  
848 2021 Apr 1;144(4):1263-76.
- 849 **55.** Yezhuvath US, Uh J, Cheng Y, Martin-Cook K, Weiner M, Diaz-Arrastia R, van  
850 Osch M, Lu H. Forebrain-dominant deficit in cerebrovascular reactivity in  
851 Alzheimer's disease. *Neurobiology of aging*. 2012 Jan 1;33(1):75-82.  
852 <https://doi.org/10.1016/j.neurobiolaging.2010.02.005>

Impaired Cerebrovascular Reactivity in Genetic Frontotemporal Dementia

- 853           **56.** Cash DM, Bocchetta M, Thomas DL, Dick KM, van Swieten JC, Borroni B,  
854           Galimberti D, Masellis M, Tartaglia MC, Rowe JB, Graff C. Patterns of gray  
855           matter atrophy in genetic frontotemporal dementia: results from the GENFI study.  
856           Neurobiology of aging. 2018 Feb 1;62:191-6.  
857           <https://doi.org/10.1016/j.neurobiolaging.2017.10.008>
- 858           **57.** Tsvetanov KA, Gazzina S, Jones PS, van Swieten J, Borroni B, Sanchez Valle  
859           R, Moreno F, Laforce Jr R, Graff C, Synofzik M, Galimberti D. Brain functional  
860           network integrity sustains cognitive function despite atrophy in presymptomatic  
861           genetic frontotemporal dementia. Alzheimer's & Dementia. 2021 Mar;17(3):500-  
862           14. <https://doi.org/10.1002/alz.12209>
- 863           **58.** Mutsaerts HJ, Petr J, Thomas DL, De Vita E, Cash DM, van Osch MJ, Golay X,  
864           Groot PF, Ourselin S, van Swieten J, Laforce Jr R. Comparison of arterial spin  
865           labeling registration strategies in the multi-center GENetic frontotemporal  
866           dementia initiative (GENFI). Journal of Magnetic Resonance Imaging. 2018  
867           Jan;47(1):131-40. <https://doi.org/10.1002/jmri.25751>
- 868           **59.** Menon V, Uddin LQ. Saliency, switching, attention and control: a network model  
869           of insula function. Brain structure and function. 2010 Jun;214:655-67.  
870           <https://doi.org/10.1007/s00429-010-0262-0>
- 871           **60.** Seeley WW. Anterior insula degeneration in frontotemporal dementia. Brain  
872           Structure and Function. 2010 Jun;214:465-75. [https://doi.org/10.1007/s00429-  
873           010-0263-z](https://doi.org/10.1007/s00429-010-0263-z)
- 874           **61.** De la Torre JC. Alzheimer disease as a vascular disorder: nosological evidence.  
875           Stroke. 2002 Apr 1;33(4):1152-62.  
876           <https://doi.org/10.1161/01.STR.0000014421.15948.67>



- 877           **62.** Iadecola C. Neurovascular regulation in the normal brain and in Alzheimer's  
878           disease. *Nature Reviews Neuroscience*. 2004 May 1;5(5):347-60.  
879           <https://doi.org/10.1038/nrn1387>
- 880           **63.** Chun MY, Jang H, Kim SJ, Park YH, Yun J, Lockhart SN, Weiner M, De Carli  
881           C, Moon SH, Choi JY, Nam KR. Emerging role of vascular burden in AT (N)  
882           classification in individuals with Alzheimer's and concomitant cerebrovascular  
883           burdens. *Journal of Neurology, Neurosurgery & Psychiatry*. 2024 Jan 1;95(1):44-  
884           51. <https://doi.org/10.1136/jnnp-2023-331603>
- 885           **64.** Claassen JA, Jansen RW. Cholinergically mediated augmentation of cerebral  
886           perfusion in alzheimer's disease and related cognitive disorders: the cholinergic-  
887           vascular hypothesis. *The Journals of Gerontology Series A: Biological Sciences*  
888           and *Medical Sciences*. 2006 Mar 1;61(3):267-71.  
889           <https://doi.org/10.1093/gerona/61.3.267>
- 890           **65.** Lyons D, Roy S, Patel M, Benjamin N, Swift CG. Impaired nitric oxide-mediated  
891           vasodilatation and total body nitric oxide production in healthy old age. *Clinical*  
892           *Science*. 1997 Dec 1;93(6):519-25. <https://doi.org/10.1042/cs0930519>
- 893           **66.** Makedonov I, Black SE, MacIntosh BJ. BOLD fMRI in the white matter as a  
894           marker of aging and small vessel disease. *PloS one*. 2013 Jul 2;8(7):e67652.  
895           <https://doi.org/10.1371/journal.pone.0067652>
- 896           **67.** Premi E, Calhoun VD, Diano M, Gazzina S, Cosseddu M, Alberici A, Archetti S,  
897           Paternicò D, Gasparotti R, van Swieten J, Galimberti D. The inner fluctuations of  
898           the brain in presymptomatic frontotemporal dementia: the chronnectome  
899           fingerprint. *Neuroimage*. 2019 Apr 1;189:645-54.  
900           <https://doi.org/10.1016/j.neuroimage.2019.01.080>

Impaired Cerebrovascular Reactivity in Genetic Frontotemporal Dementia

- 901           **68.** Liu X, Tyler LK, CamCAN, Rowe JB, Tsvetanov KA. Multimodal fusion  
902           analysis of functional, cerebrovascular, and structural neuroimaging in healthy  
903           aging subjects. *Human brain mapping*. 2022 Dec 15;43(18):5490-508.  
904           <https://doi.org/10.1002/hbm.26025>
- 905           **69.** Rohrer JD, Ridgway GR, Modat M, Ourselin S, Mead S, Fox NC, Rossor MN,  
906           Warren JD. Distinct profiles of brain atrophy in frontotemporal lobar  
907           degeneration caused by progranulin and tau mutations. *Neuroimage*. 2010 Nov  
908           15;53(3):1070-6. <https://doi.org/10.1016/j.neuroimage.2009.12.088>
- 909           **70.** Sur S, Lin Z, Li Y, Yasar S, Rosenberg P, Moghekar A, Hou X, Kalyani R, Hazel  
910           K, Pottanat G, Xu C. Association of cerebrovascular reactivity and Alzheimer  
911           pathologic markers with cognitive performance. *Neurology*. 2020 Aug  
912           25;95(8):e962-72. <https://doi.org/10.1212/WNL.00000000000010133>
- 913           **71.** Liu X, Tyler LK, Davis SW, Rowe JB, Tsvetanov KA. Cognition's dependence  
914           on functional network integrity with age is conditional on structural network  
915           integrity. *Neurobiology of Aging*. 2023 Sep 1;129:195-208.  
916           <https://doi.org/10.1016/j.neurobiolaging.2023.06.001>
- 917           **72.** Passamonti L, Tsvetanov KA, Jones PS, Bevan-Jones WR, Arnold R, Borchert  
918           RJ, Mak E, Su L, O'brien JT, Rowe JB. Neuroinflammation and functional  
919           connectivity in Alzheimer's disease: interactive influences on cognitive  
920           performance. *Journal of Neuroscience*. 2019 Sep 4;39(36):7218-26.  
921           <https://doi.org/10.1523/JNEUROSCI.2574-18.2019>
- 922           **73.** Tsvetanov KA, Henson RN, Tyler LK, Razi A, Geerligs L, Ham TE, Rowe JB.  
923           Extrinsic and intrinsic brain network connectivity maintains cognition across the  
924           lifespan despite accelerated decay of regional brain activation. *Journal of*

Impaired Cerebrovascular Reactivity in Genetic Frontotemporal Dementia

- 925 Neuroscience. 2016 Mar 16;36(11):3115-26.
- 926 <https://doi.org/10.1523/JNEUROSCI.2733-15.2016>
- 927 **74.** Tsvetanov KA, Ye Z, Hughes L, Samu D, Treder MS, Wolpe N, Tyler LK, Rowe
- 928 JB. Activity and connectivity differences underlying inhibitory control across the
- 929 adult life span. *Journal of Neuroscience*. 2018 Sep 5;38(36):7887-900.
- 930 <https://doi.org/10.1523/JNEUROSCI.2919-17.2018>
- 931 **75.** Wu S, Tyler LK, Henson RN, Rowe JB, Tsvetanov KA. Cerebral blood flow
- 932 predicts multiple demand network activity and fluid intelligence across the adult
- 933 lifespan. *Neurobiology of aging*. 2023 Jan 1;121:1-4.
- 934 <https://doi.org/10.1016/j.neurobiolaging.2022.09.006>
- 935
- 936

## Cerebrovascular reactivity impairment in genetic frontotemporal dementia

**Table 1.** Demographic information of participants included in the analysis, grouped by genetic status as non-carriers, pre-symptomatic carriers, and symptomatic carriers

| Demographics               | Sample       | NC           | PSC          | SC          | Group comparison,<br>P value* |                 |                 |           |
|----------------------------|--------------|--------------|--------------|-------------|-------------------------------|-----------------|-----------------|-----------|
|                            |              |              |              |             | Sample                        | NC vs SC        | PSC vs SC       | NC vs PSC |
| Total N                    | 673          | 265 (39.38)  | 284 (42.2)   | 124 (18.42) |                               |                 |                 |           |
| Family mutation            |              |              |              |             |                               |                 |                 | .126      |
| <i>C9orf72</i>             | 264 (39.23)  |              | 107          | 61          |                               |                 |                 |           |
| <i>GRN</i>                 | 276 (41.01)  |              | 123          | 40          |                               |                 |                 |           |
| <i>MAPT</i>                | 133 (19.76)  |              | 54           | 23          |                               |                 |                 |           |
| Age (years)                | 48.17±13.43  | 45.95±13.09  | 43.93±11.4   | 62.64±7.43  | <b>&lt;.001</b>               | <b>&lt;.001</b> | <b>&lt;.001</b> | .132      |
| Sex ratio f:m              | 371:302      | 153:112      | 165:119      | 53:71       | <b>.009</b>                   | <b>.006</b>     | <b>.004</b>     | .931      |
| Estimated years from onset | -10.62±13.40 | -13.21±13.47 | -14.30±11.63 | 3.32±6.24   | <b>&lt;.001</b>               | <b>&lt;.001</b> | <b>&lt;.001</b> | .569      |
| Education (years)          | 14.18±3.45   | 14.51±3.35   | 14.50±3.36   | 12.72±3.53  | <b>&lt;.001</b>               | <b>&lt;.001</b> | <b>&lt;.001</b> | .998      |

Values indicate count (percentage) or mean ± standard deviation.

\*P values are the result of F test or  $\chi^2$  test as appropriate. Bold numbers denote statistical significance at  $p < 0.05$  level.

Abbreviations: *C9orf72*, chromosome 9 open reading frame 72; *GRN*, progranulin; *MAPT*, microtubule-associated protein tau. NC, non-carrier; PSC, pre-symptomatic mutation carrier; SC, symptomatic mutation carrier. f, female; m, male.

## Cerebrovascular reactivity impairment in genetic frontotemporal dementia

**Table 2.** Multiple regression analysis results of independent component (IC) subject loadings from independent component analysis (model ' $RSFA_{IC} \sim I + Genetic\ status * Age + Sex + Handedness + Scanning\ Site$ ')

| Predictor of interest                               | Model<br>Adjusted R <sup>2</sup> | $\beta$      | T            | Uncorrected<br>P | FDR-<br>corrected P* |
|-----------------------------------------------------|----------------------------------|--------------|--------------|------------------|----------------------|
| <b>IC 4 – Posterior cingulate cortex/precuneus</b>  |                                  |              |              |                  |                      |
|                                                     | 0.62                             |              |              |                  |                      |
| Age                                                 |                                  | <b>-0.09</b> | <b>-3.59</b> | <b>&lt;.001</b>  | <b>.001</b>          |
| Genetic status                                      |                                  | -0.05        | -1.77        | .078             | .124                 |
| Genetic status*Age                                  |                                  | -0.05        | -2.00        | .046             | .085                 |
| <b>IC 17 – Posterior parietal association areas</b> |                                  |              |              |                  |                      |
|                                                     | 0.54                             |              |              |                  |                      |
| Age                                                 |                                  | <b>-0.13</b> | <b>-4.27</b> | <b>&lt;.001</b>  | <b>&lt;.001</b>      |
| Genetic status                                      |                                  | -0.06        | -1.80        | .072             | .098                 |
| Genetic status*Age                                  |                                  | <b>-0.06</b> | <b>-2.17</b> | <b>.030</b>      | <b>.048</b>          |
| <b>IC 21 – Right lateral prefrontal cortex</b>      |                                  |              |              |                  |                      |
|                                                     | 0.44                             |              |              |                  |                      |
| Age                                                 |                                  | <b>-0.11</b> | <b>-3.33</b> | <b>&lt;.001</b>  | <b>.004</b>          |
| Genetic status                                      |                                  | <b>-0.10</b> | <b>-2.68</b> | <b>.008</b>      | <b>.021</b>          |
| Genetic status*Age                                  |                                  | <b>-0.07</b> | <b>-2.31</b> | <b>.021</b>      | <b>.046</b>          |
| <b>IC 23 – Left lateral prefrontal cortex</b>       |                                  |              |              |                  |                      |
|                                                     | 0.49                             |              |              |                  |                      |
| Age                                                 |                                  | <b>-0.22</b> | <b>-7.22</b> | <b>&lt;.001</b>  | <b>&lt;.001</b>      |

|                    |              |              |             |             |
|--------------------|--------------|--------------|-------------|-------------|
| Genetic status     | -0.06        | -1.87        | .062        | .168        |
| Genetic status*Age | <b>-0.08</b> | <b>-2.52</b> | <b>.012</b> | <b>.044</b> |

---

RSFA differences across groups of interest following robust multiple linear regression analysis on component-based RSFA maps. Estimated regression parameters, t values, and  $p$  values are shown for main effects across the entire sample. Outcomes of interest are the RSFA-IC loadings associated with ICA components within GM regions where case-control differences are found. Models are adjusted for sex, handedness, and scanning site.

\* $P$  values are FDR-corrected at the 0.05 level in comparisons across the whole sample (all genetic status groups combined). Bold numbers indicate that  $p$  values are statistically significant.

### Cerebrovascular reactivity impairment in genetic frontotemporal dementia

**Table 3.** Multiple regression analysis results following voxel-based region of interest analysis (model ' $RSFA_{Voxel} \sim I + Genetic\ Status * Age + Sex + Handedness + Scanning\ Site$ ')

| Predictor of interest               | Model<br>Adjusted R <sup>2</sup> | $\beta$      | T            | Uncorrected<br>P | FDR-<br>corrected P* |
|-------------------------------------|----------------------------------|--------------|--------------|------------------|----------------------|
| <b>Left middle frontal gyrus</b>    | 0.23                             |              |              |                  |                      |
| Age                                 |                                  | <b>-0.09</b> | <b>-2.51</b> | <b>.012</b>      | <b>.034</b>          |
| Genetic status                      |                                  | <b>-0.14</b> | <b>-3.25</b> | <b>.001</b>      | <b>.005</b>          |
| Genetic status*Age                  |                                  | <b>-0.16</b> | <b>-4.28</b> | <b>&lt;.001</b>  | <b>&lt;.001</b>      |
| <b>Right middle frontal gyrus</b>   | 0.25                             |              |              |                  |                      |
| Age                                 |                                  | <b>-0.13</b> | <b>-3.72</b> | <b>&lt;.001</b>  | <b>.002</b>          |
| Genetic status                      |                                  | <b>-0.15</b> | <b>-3.72</b> | <b>&lt;.001</b>  | <b>.002</b>          |
| Genetic status*Age                  |                                  | <b>-0.08</b> | <b>-2.25</b> | <b>.025</b>      | <b>.041</b>          |
| <b>Left superior frontal gyrus</b>  | 0.17                             |              |              |                  |                      |
| Age                                 |                                  | -0.05        | -1.37        | .170             | .320                 |
| Genetic status                      |                                  | <b>-0.19</b> | <b>-4.45</b> | <b>&lt;.001</b>  | <b>&lt;.001</b>      |
| Genetic status*Age                  |                                  | -0.08        | -2.16        | .031             | .093                 |
| <b>Right superior frontal gyrus</b> | 0.26                             |              |              |                  |                      |
| Age                                 |                                  | <b>-0.10</b> | <b>-2.79</b> | <b>.005</b>      | <b>.013</b>          |
| Genetic status                      |                                  | -0.17        | -4.09        | <b>&lt;.001</b>  | <b>&lt;.001</b>      |
| Genetic status*Age                  |                                  | 0.06         | -1.54        | .123             | .148                 |

RSFA differences across groups of interest following robust multiple linear regression analysis in several representative ROIs based on voxel-wise univariate analysis on RSFA maps. Estimated regression parameters, t values, and p values are shown for main effects across the entire sample. Outcomes of interest are the RSFA-ROI values associated with each ROI where case-control

---

differences are found. Models are adjusted for sex, handedness, and scanning site.

\**P* values are FDR-corrected at the 0.05 level across the whole sample (all genetic status groups combined). Bold numbers indicate that *p* values are statistically significant.





|             |             |             |             |      |      |      |      |      |      |      |      |      |
|-------------|-------------|-------------|-------------|------|------|------|------|------|------|------|------|------|
| Genetic     | <b>0.09</b> | <b>3.40</b> | <b>.008</b> | 0.05 | 1.91 | .057 | 0.02 | 0.64 | .523 | 0.05 | 1.26 | .207 |
| status*RSFA |             |             |             |      |      |      |      |      |      |      |      |      |

---

### IC 23 – Left lateral prefrontal cortex

---

|                |              |               |                 |             |               |                 |              |               |                 |              |              |                 |
|----------------|--------------|---------------|-----------------|-------------|---------------|-----------------|--------------|---------------|-----------------|--------------|--------------|-----------------|
|                | 0.52         |               |                 |             |               |                 |              |               |                 |              |              |                 |
| Age            | <b>-0.40</b> | <b>-12.85</b> | <b>&lt;.001</b> | <b>0.22</b> | <b>-6.05</b>  | <b>&lt;.001</b> | <b>-0.29</b> | <b>-7.24</b>  | <b>&lt;.001</b> | <b>-0.36</b> | <b>-8.92</b> | <b>&lt;.001</b> |
| Genetic status | <b>-0.38</b> | <b>-12.33</b> | <b>&lt;.001</b> | <b>0.67</b> | <b>-17.51</b> | <b>&lt;.001</b> | <b>-0.59</b> | <b>-14.28</b> | <b>&lt;.001</b> | -0.01        | -0.19        | .846            |
| RSFA           | <b>0.11</b>  | <b>2.88</b>   | <b>.029</b>     | 0.07        | 1.69          | .091            | 0.07         | 1.76          | .079            | 0.07         | 1.38         | .169            |
| Genetic        | <b>0.08</b>  | <b>2.83</b>   | <b>.030</b>     | 0.01        | 0.21          | .831            | 0.03         | 1.06          | .289            | -0.04        | -0.90        | .367            |
| status*RSFA    |              |               |                 |             |               |                 |              |               |                 |              |              |                 |

---

### *ROIs based on Voxel-wise Analysis*

---

#### Left middle frontal gyrus

---

|                |              |               |                 |              |               |                 |              |               |                 |              |              |                 |
|----------------|--------------|---------------|-----------------|--------------|---------------|-----------------|--------------|---------------|-----------------|--------------|--------------|-----------------|
|                | 0.57         |               |                 |              |               |                 |              |               |                 |              |              |                 |
| Age            | <b>-0.38</b> | <b>-12.92</b> | <b>&lt;.001</b> | <b>-0.20</b> | <b>-6.01</b>  | <b>&lt;.001</b> | <b>-0.28</b> | <b>-7.58</b>  | <b>&lt;.001</b> | <b>-0.36</b> | <b>-9.17</b> | <b>&lt;.001</b> |
| Genetic status | <b>-0.35</b> | <b>-11.51</b> | <b>&lt;.001</b> | <b>-0.60</b> | <b>-15.18</b> | <b>&lt;.001</b> | <b>0.53</b>  | <b>-12.82</b> | <b>&lt;.001</b> | -0.003       | -0.07        | .944            |
| RSFA           | <b>0.13</b>  | <b>4.42</b>   | <b>&lt;.001</b> | <b>0.10</b>  | <b>2.95</b>   | <b>.003</b>     | <b>0.14</b>  | <b>4.35</b>   | <b>&lt;.001</b> | -0.03        | -0.82        | .412            |
| Genetic        | <b>0.23</b>  | <b>8.02</b>   | <b>&lt;.001</b> | <b>0.22</b>  | <b>6.60</b>   | <b>&lt;.001</b> | <b>0.16</b>  | <b>4.84</b>   | <b>&lt;.001</b> | 0.07         | 1.73         | .085            |
| status*RSFA    |              |               |                 |              |               |                 |              |               |                 |              |              |                 |

---

#### Right middle frontal gyrus

---

|                |              |               |                 |              |               |                 |              |               |                 |              |              |                 |
|----------------|--------------|---------------|-----------------|--------------|---------------|-----------------|--------------|---------------|-----------------|--------------|--------------|-----------------|
|                | 0.54         |               |                 |              |               |                 |              |               |                 |              |              |                 |
| Age            | <b>-0.41</b> | <b>-13.76</b> | <b>&lt;.001</b> | <b>-0.24</b> | <b>-6.61</b>  | <b>&lt;.001</b> | <b>-0.30</b> | <b>-7.63</b>  | <b>&lt;.001</b> | <b>-0.37</b> | <b>-9.26</b> | <b>&lt;.001</b> |
| Genetic status | <b>-0.37</b> | <b>-11.84</b> | <b>&lt;.001</b> | <b>-0.64</b> | <b>-15.63</b> | <b>&lt;.001</b> | <b>-0.58</b> | <b>-14.04</b> | <b>&lt;.001</b> | -0.003       | -0.07        | .943            |
| RSFA           | <b>0.11</b>  | <b>3.59</b>   | <b>.003</b>     | <b>0.07</b>  | <b>2.11</b>   | <b>.036</b>     | <b>0.07</b>  | <b>2.15</b>   | <b>.032</b>     | 0.05         | 1.12         | .261            |
| Genetic        | <b>0.15</b>  | <b>5.25</b>   | <b>&lt;.001</b> | <b>0.07</b>  | <b>2.06</b>   | <b>.040</b>     | 0.04         | 1.30          | .195            | 0.05         | 1.23         | .220            |
| status*RSFA    |              |               |                 |              |               |                 |              |               |                 |              |              |                 |

---

#### Left superior frontal gyrus

---

|     |              |               |                 |              |              |                 |              |              |                 |              |              |                 |
|-----|--------------|---------------|-----------------|--------------|--------------|-----------------|--------------|--------------|-----------------|--------------|--------------|-----------------|
|     | 0.54         |               |                 |              |              |                 |              |              |                 |              |              |                 |
| Age | <b>-0.42</b> | <b>-13.88</b> | <b>&lt;.001</b> | <b>-0.23</b> | <b>-6.47</b> | <b>&lt;.001</b> | <b>-0.30</b> | <b>-7.98</b> | <b>&lt;.001</b> | <b>-0.37</b> | <b>-9.36</b> | <b>&lt;.001</b> |

|                |              |               |                 |              |               |                 |              |               |                 |       |       |      |
|----------------|--------------|---------------|-----------------|--------------|---------------|-----------------|--------------|---------------|-----------------|-------|-------|------|
| Genetic status | <b>-0.38</b> | <b>-12.10</b> | <b>&lt;.001</b> | <b>-0.64</b> | <b>-16.37</b> | <b>&lt;.001</b> | <b>-0.58</b> | <b>-13.94</b> | <b>&lt;.001</b> | -0.01 | -0.17 | .861 |
| RSFA           | <b>0.08</b>  | <b>2.49</b>   | <b>.054</b>     | 0.06         | 1.85          | .065            | 0.05         | 1.67          | .096            | -0.04 | -0.85 | .398 |
| Genetic        | <b>0.14</b>  | <b>4.83</b>   | <b>&lt;.001</b> | <b>0.12</b>  | <b>3.57</b>   | <b>&lt;.001</b> | <b>0.09</b>  | <b>2.99</b>   | <b>.003</b>     | 0.002 | 0.06  | .951 |
| status*RSFA    |              |               |                 |              |               |                 |              |               |                 |       |       |      |

---

### Right superior frontal gyrus

---

0.54

|                |              |               |                 |              |               |                 |              |               |                 |              |              |                 |
|----------------|--------------|---------------|-----------------|--------------|---------------|-----------------|--------------|---------------|-----------------|--------------|--------------|-----------------|
| Age            | <b>-0.42</b> | <b>-14.05</b> | <b>&lt;.001</b> | <b>-0.23</b> | <b>-6.59</b>  | <b>&lt;.001</b> | <b>-0.30</b> | <b>-7.72</b>  | <b>&lt;.001</b> | <b>-0.37</b> | <b>-9.43</b> | <b>&lt;.001</b> |
| Genetic status | <b>-0.39</b> | <b>-12.64</b> | <b>&lt;.001</b> | <b>-0.67</b> | <b>-17.30</b> | <b>&lt;.001</b> | <b>-0.60</b> | <b>-14.64</b> | <b>&lt;.001</b> | -0.01        | -0.29        | .769            |
| RSFA           | 0.03         | 0.82          | .610            |              |               |                 |              |               |                 |              |              |                 |
| Genetic        | <b>0.15</b>  | <b>5.29</b>   | <b>&lt;.001</b> | <b>0.09</b>  | <b>2.91</b>   | <b>.004</b>     | 0.04         | 1.28          | .201            | 0.07         | 1.90         | .058            |
| status*RSFA    |              |               |                 |              |               |                 |              |               |                 |              |              |                 |

Cognitive function differences as a function of RSFA and genetic status following robust multiple linear regression analysis in ICA-based components (top panel) and several representative ROIs based on voxel-wise univariate analysis on RSFA maps (bottom panel). Cognitive function is represented by subjects' loading values for PC 1 following PCA on nine cognitive measures. Estimated regression parameters, t values, and *p* values are shown for main effects across the entire sample and sub-groups of interest where relevant. Models are adjusted for age, sex, handedness, and scanning site.

\**P*-values are FDR-corrected at the 0.05 level across the whole sample (all genetic status groups combined). Bold numbers indicate that *p* values are statistically significant.

Abbreviations: NC, non-carrier; PSC, pre-symptomatic mutation carrier; SC, symptomatic mutation carrier.

## Cerebrovascular reactivity impairment in genetic frontotemporal dementia

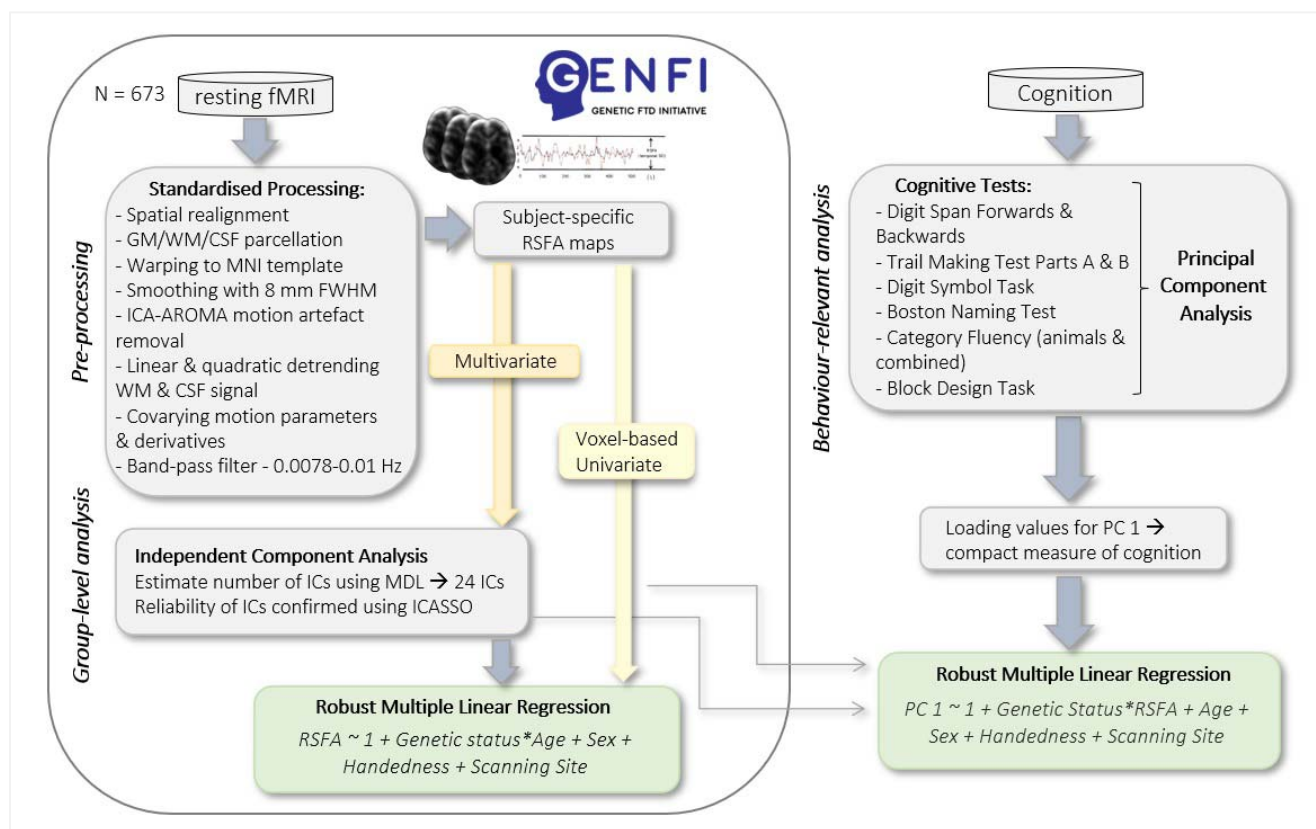

**Figure 1.** Schematic representation of the pre-processing pipeline and analytic approach used in the study.

## Cerebrovascular reactivity impairment in genetic frontotemporal dementia

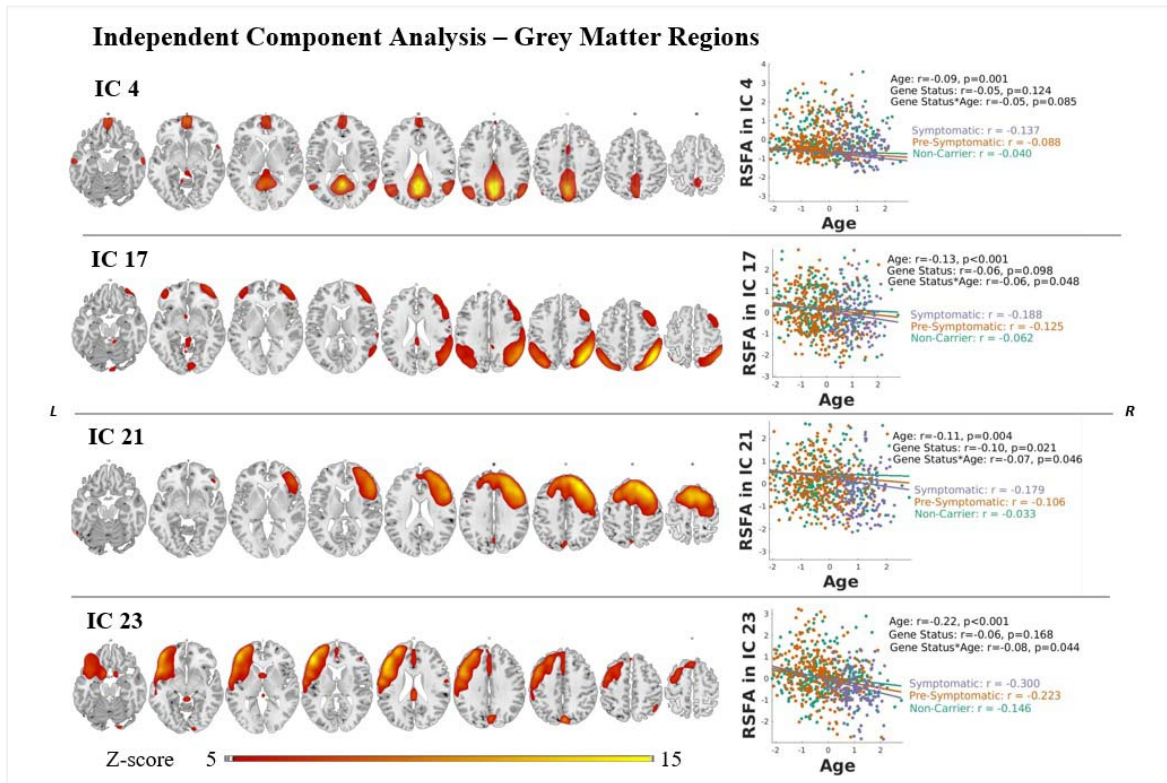

**Figure 2.** Spatial distribution of 4 independent components (ICs) within neurocognitively meaningful areas (i.e., GM regions) based on ICA on RSFA maps across subjects where differences in IC loading values are found in association with genetic status, age, and genetic status x age interaction. Robust general linear model regression lines for each IC are presented in scatter plots with respective  $r$  values on the right side of each IC map. P values are FDR-corrected at the 0.05 level across the whole sample. Group-level spatial maps are overlaid onto the Colin-27 (ch2.nii) structural template of the MNI brain, where intensity values correspond to z-values.

## Cerebrovascular reactivity impairment in genetic frontotemporal dementia

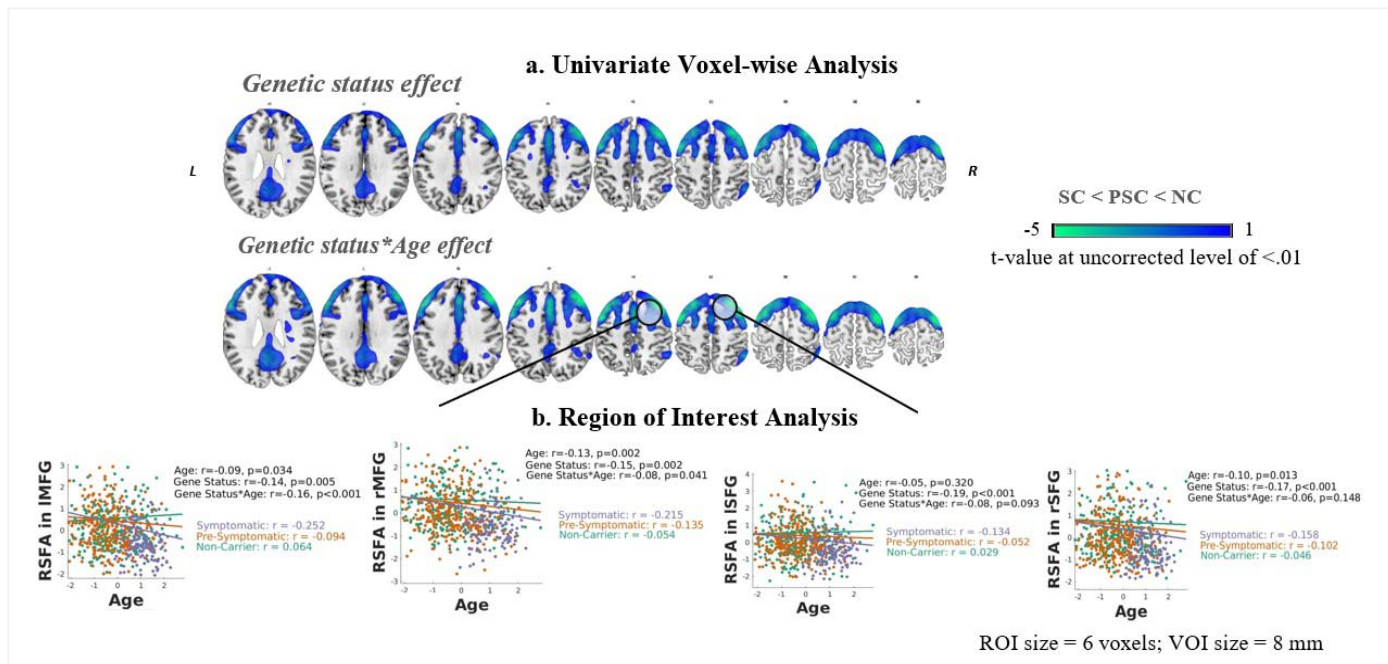

**Figure 3.** Panel A. Regional distribution of RSFA effects based on voxel-wise univariate analysis. Cold colours denote RSFA decreases as a function of genetic status and their interaction with age. Statistical parametric maps are displayed at an uncorrected level of  $p < 0.01$  to better visualise regional CVR patterns. Images are overlaid onto the Colin-27 (ch2.nii) structural template of the MNI brain. Panel B. Differences in RSFA in association with genetic status, age, and genetic status x age interaction across groups of interest in several representative ROIs based on voxel-wise univariate analysis. Robust general linear model regression lines for each ROI are presented in scatter plots with respective  $r$  values on the right side of each ROI map. P values are FDR-corrected at the 0.05 level across the whole sample. NC, non-carrier; PSC, pre-symptomatic mutation carrier; SC, symptomatic mutation carrier. MFG, middle frontal gyrus; SFG, superior frontal gyrus. ROI, region of interest; VOI, volume of interest.



## Cerebrovascular reactivity impairment in genetic frontotemporal dementia

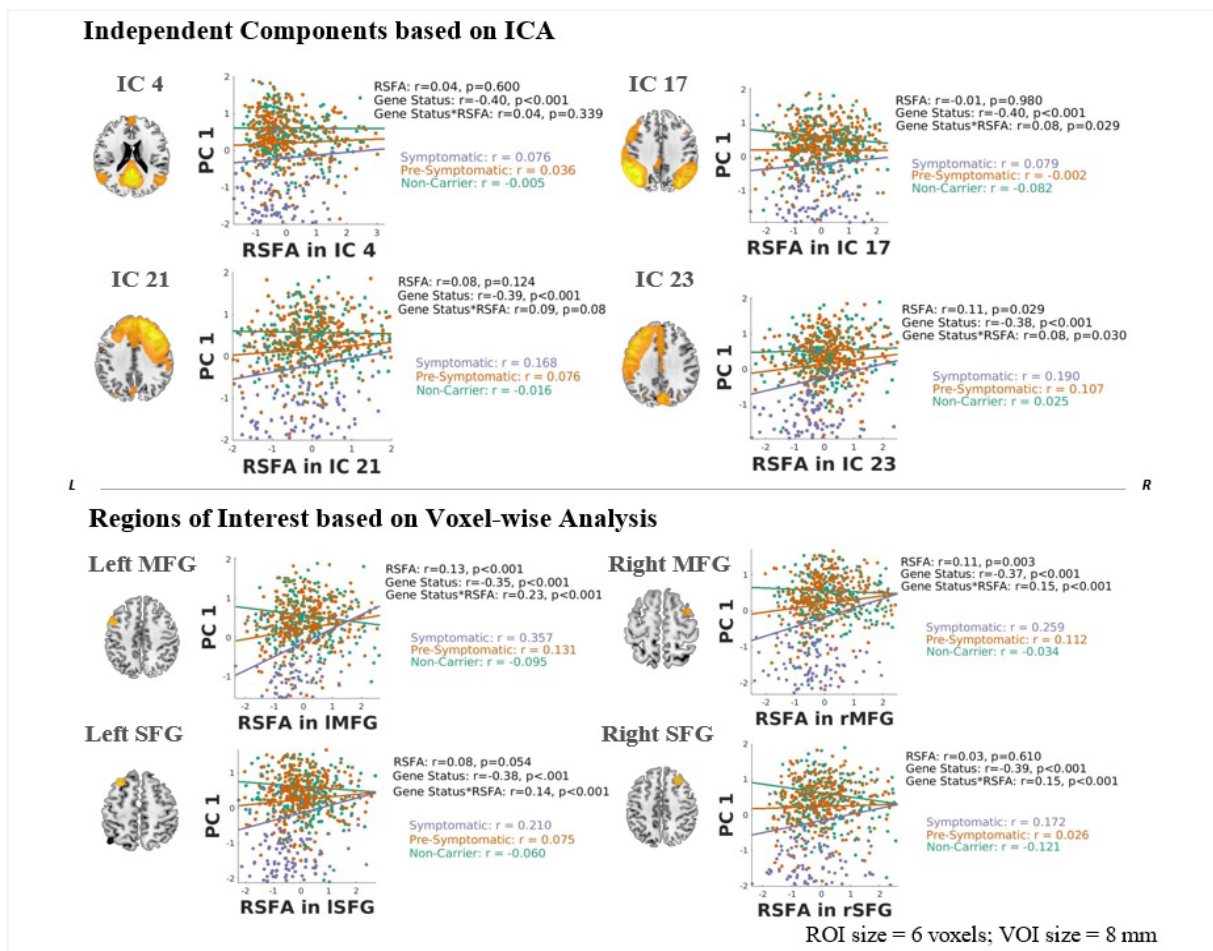

**Figure 4.** Differences in cognitive function in association with genetic status, RSFA, and genetic status x RSFA interaction across groups of interest. Cognitive function is denoted by subjects' loading values for PC 1 following PCA on nine cognitive measures. Effects are illustrated for ICA-based components within GM areas (top panel) and several representative ROIs based on voxel-wise analysis (bottom panel). Robust general linear model regression lines for each respective IC and ROI are presented in scatter plots with corresponding  $r$  values on the right side of a representative slice depicting each IC/ROI map. P values are

FDR-corrected at the 0.05 level across the whole sample. MFG, middle frontal gyrus; SFG, superior frontal gyrus. ROI, region of interest; VOI, volume of interest.
